# Supplementary material for: Directed Evolution of a Cp*RhIII‐Linked Biohybrid Catalyst Based on a Screening Platform with Affinity Purification
Source: PubMed Central journal article supplement (PMC7894531; doi:10.1002/cbic.202000681), 2020-11-09
Supplement: CBIC-22-679-s001.pdf [file CBIC-22-679-s001.pdf]

# ChemBioChem

Supporting Information

## **Directed Evolution of a Cp\*Rh<sup>III</sup>-Linked Biohybrid Catalyst Based on a Screening Platform with Affinity Purification**

Shunsuke Kato, Akira Onoda,\* Naomasa Taniguchi, Ulrich Schwaneberg, and Takashi Hayashi\*

# Supporting Information

## **General Information**

**Instruments.**  $^1\text{H}$  NMR,  $^{13}\text{C}$  NMR, and  $^{31}\text{P}$  NMR spectra were recorded on a Bruker NMR Advance III HD spectrometer (400 MHz).  $^1\text{H}$  and  $^{13}\text{C}$  NMR chemical shifts are reported relative to deuterated solvents.  $^{31}\text{P}$  NMR chemical shifts are reported relative to 85%  $\text{H}_3\text{PO}_4$  in  $\text{D}_2\text{O}$  (0 ppm). ESI-TOF MS analyses were performed on a Bruker micrOTOF focus III mass spectrometer. MALDI-TOF MS analyses were performed on a Bruker autoflex III mass spectrometer. The GC-MS experiments were performed on a Shimadzu GCMS-QP2010 Ultra Gas Chromatograph Mass Spectrometer. UV-vis spectra were measured with a Shimadzu UV-2700 spectrophotometer and Molecular Devices SpectraMax iD5 Multi-Mode Microplate Reader. Fluorescence spectroscopic measurements were carried out with a JASCO Spectrofluorometer FP-8600 and a Molecular Devices SpectraMax iD5 Multi-Mode Microplate Reader. CD spectra were measured using a JASCO J-820AC Spectrometer. PCR was performed using Bio-Rad T100<sup>TM</sup> Thermal Cycler. Ultrapure water was demineralized using a Merck Millipore Milli-Q integral 3 system.

**Materials.** Oligonucleotides were obtained from Sigma-Aldrich, Inc. Nucleotide sequences were determined by FASMAC Co., Ltd and Eurofins Scientific SE, Inc. All reagents of the highest guaranteed grade were purchased from TCI Co. Ltd., Sigma-Aldrich, Inc., FUJIFILM Wako Pure Chemical Corporation and Nacalai Tesque, Inc., and used as received unless otherwise noted. Agarose was purchased from Sigma-Aldrich, Inc. (molecular biology grade, low EEO). Soluble starch was purchased from Nacalai Tesque, Inc. (molecular biology grade). Paraffin oil was purchased from Sigma-Aldrich, Inc. (IR spectroscopy grade). Tween 80 was purchased from TCI Co. Ltd. The rhodium cofactor **1**, 3',4'-ethylenedioxyacetophenone oxime (**2a**), and the authentic samples of isoquinolines **4ab** and **5ab** were synthesized as described in our previous report.<sup>[1]</sup> *tert*-Butyl 3-(2-hydroxyethoxy)propanoate (**S1**)<sup>[2]</sup> and  $[(\eta^5\text{-Me}_4\text{Cp}(\text{CH}_2)_2\text{NH}_3)\text{RhCl}_2]_2\text{Cl}_2$  **S2**<sup>[3]</sup> were synthesized according to the literature.

## Synthesis Procedure

### Scheme S1. Synthetic scheme of cofactor 1'

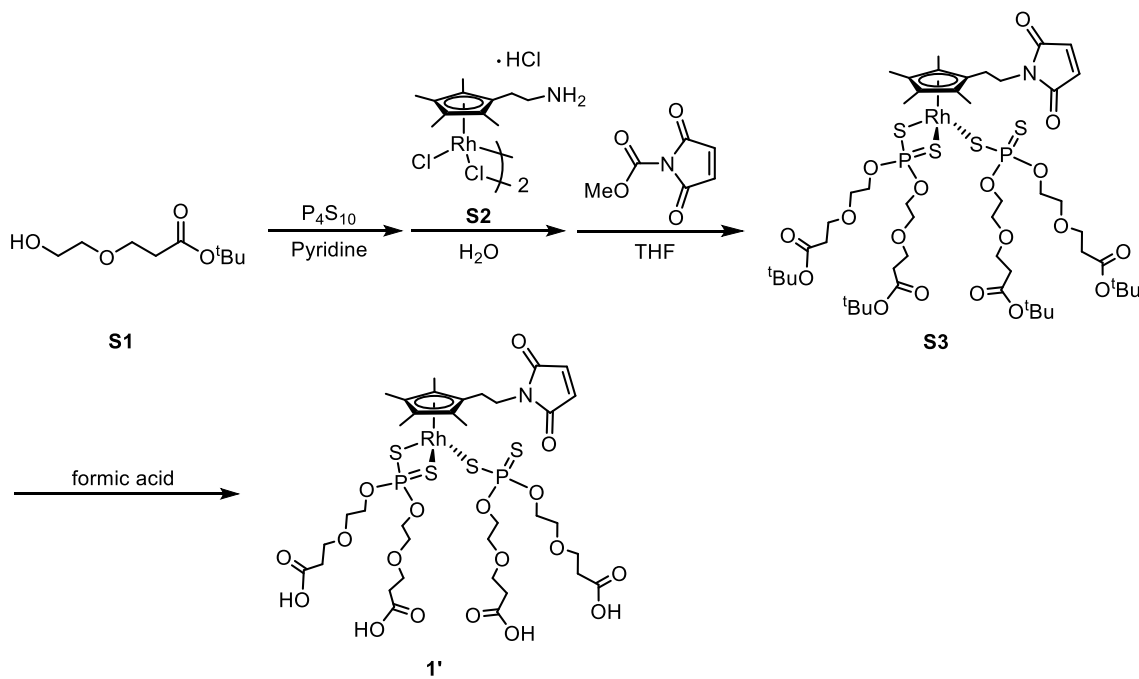

**Synthesis of S3:**  $P_4S_{10}$  (56.5 mg, 0.127 mmol) was dissolved in anhydrous pyridine (5 mL), and the solution was stirred for 10 min at room temperature in a glove box. *tert*-Butyl 3-(2-hydroxyethoxy)propanoate (**S1**) (163 mg, 1.02 mmol) was added into the solution at 80 °C and the reaction mixture was stirred overnight. After the reaction mixture was cooled to room temperature, generated  $H_2S$  gas was removed by  $N_2$  bubbling. A solution containing pyridinium dithiophosphate was added into a solution of  $[(\eta^5\text{-Me}_4\text{Cp}(\text{CH}_2)_2\text{NH}_3)\text{RhCl}_2]_2\text{Cl}_2$  **S2** (85.6 mg, 0.229 mmol) in  $H_2O$  (40 mL), with stirring for 5 min at room temperature. The reaction mixture was extracted with  $\text{CHCl}_3$ . The organic layer was washed with  $\text{NaHCO}_3\text{aq}$ , a 5% citric acid solution, and water, and then dried *in vacuo*. The residue was dissolved in anhydrous THF (5 mL), and cannulated into a solution of *N*-methoxycarbonylmaleimide (39.4 mg, 0.254 mmol) in anhydrous THF (10 mL). The mixture was then stirred for 5 h at room temperature. To the reaction mixture was added  $\text{NaHCO}_3\text{aq}$ , and the suspension was stirred for 30 min. The product was extracted with  $\text{CHCl}_3$ , and the organic phase was washed with  $H_2O$  and brine, and dried *in vacuo*. The residue was purified by silica gel column chromatography ( $\text{CHCl}_3/\text{MeOH} = 99/1$ ) to afford complex **S3** as red oil. Yield: 34%.  $^1\text{H NMR}$  (400

MHz, CDCl<sub>3</sub>):  $\delta$  6.70 (s, 2H), 4.08–4.18 (m, 8H), 3.60–3.70 (m, 18H), 2.59 (t,  $J = 7.1$  Hz, 2H), 2.44–2.51 (m, 8H), 1.77 (s, 6H), 1.74 (s, 6H), 1.45 (s, 9H), 1.43 (s, 18H), 1.42 (s, 9H). <sup>13</sup>C NMR (100 MHz, CDCl<sub>3</sub>):  $\delta$  170.98, 170.89, 170.83, 170.27, 134.37, 98.83 (d, <sup>1</sup>J<sub>RhC</sub> = 7.0 Hz), 98.30 (d, <sup>1</sup>J<sub>RhC</sub> = 6.7 Hz), 94.53 (d, <sup>1</sup>J<sub>RhC</sub> = 7.7 Hz), 80.80, 80.61, 70.21 (d, <sup>3</sup>J<sub>PC</sub> = 8.5 Hz), 69.90 (d, <sup>3</sup>J<sub>PC</sub> = 7.4 Hz), 69.64 (d, <sup>3</sup>J<sub>PC</sub> = 9.0 Hz), 67.36 (d, <sup>2</sup>J<sub>PC</sub> = 4.4 Hz), 67.07, 66.87, 65.21 (d, <sup>2</sup>J<sub>PC</sub> = 8.9 Hz), 65.08 (d, <sup>2</sup>J<sub>PC</sub> = 7.4 Hz), 36.44, 36.36, 35.42, 28.25, 24.01, 9.63, 9.59. <sup>31</sup>P NMR (162 MHz, CDCl<sub>3</sub>):  $\delta$  117.13 (s), 97.13 (d, <sup>2</sup>J<sub>RhP</sub> = 12.9 Hz). ESI-TOF MS (positive mode):  $m/z$  calcd. for C<sub>33</sub>H<sub>52</sub>NO<sub>10</sub>PS<sub>2</sub>Rh [M – S<sub>2</sub>P(OC<sub>2</sub>H<sub>4</sub>OC<sub>2</sub>H<sub>4</sub>CO<sub>2</sub><sup>t</sup>Bu)<sub>2</sub>]<sup>+</sup> 820.183, found 820.130.

**Synthesis of 1'**: Complex **S3** was dissolved in 2 mL of anhydrous formic acid at 0 °C and the reaction mixture was stirred at room temperature for 2 h. After removal of formic acid under reduced pressure, the residue was dissolved in AcOH, and dried *in vacuo* again to completely remove trace amounts of formic acid. <sup>1</sup>H NMR (400 MHz, acetic acid-*d*<sub>4</sub>):  $\delta$  6.84 (s, 2H), 4.15–4.22 (m, 8H), 3.67–3.85 (m, 18H), 2.62–2.70 (m, 10H), 1.81 (s, 6H), 1.77 (s, 6H). <sup>13</sup>C NMR (100 MHz, acetic acid-*d*<sub>4</sub>):  $\delta$  172.24, 135.44, 99.94, 99.36, 95.80, 71.09, 70.56, 67.96, 67.19, 66.32, 65.99, 36.05, 35.43, 30.60, 24.85, 9.98, 9.75. <sup>31</sup>P NMR (162 MHz, acetic acid-*d*<sub>4</sub>):  $\delta$  117.49 (s), 97.62 (s). ESI-TOF MS (positive mode):  $m/z$  calcd. for C<sub>25</sub>H<sub>36</sub>NO<sub>10</sub>PS<sub>2</sub>Rh [M – S<sub>2</sub>P(OC<sub>2</sub>H<sub>4</sub>OC<sub>2</sub>H<sub>4</sub>CO<sub>2</sub>H)<sub>2</sub>]<sup>+</sup> 708.057, found 708.032.

**Synthesis of substrates 2b and 2c**: A mixture of ketone (15 mmol) and hydroxylamine hydrochloride (2.50 g, 36 mmol) in a solution of EtOH (50 mL) with 5 N NaOH<sub>aq</sub> (8 mL) was refluxed overnight. After extraction with EtOAc, the organic layer was washed twice with H<sub>2</sub>O, and dried *in vacuo*. The resulting residue was recrystallized from EtOAc to afford oximes **2b** and **2c**.

**2b**: <sup>1</sup>H NMR (400 MHz, CDCl<sub>3</sub>):  $\delta$  7.98 (s, 1H), 7.17 (d,  $J = 1.7$  Hz, 1H), 7.10 (dd,  $J = 8.2$  Hz,  $J = 1.7$  Hz, 1H), 6.80 (d,  $J = 8.2$  Hz, 1H), 5.99 (s, 2H), 2.24 (s, 3H). <sup>13</sup>C NMR (100 MHz, CDCl<sub>3</sub>):  $\delta$  155.60, 148.56, 147.91, 130.74, 120.34, 108.04, 106.21, 101.29, 12.11. ESI-TOF MS (positive mode):  $m/z$  calcd. for C<sub>9</sub>H<sub>10</sub>NO<sub>3</sub> [M + H]<sup>+</sup> 180.065, found 180.066.

**2c**: <sup>1</sup>H NMR (400 MHz, CDCl<sub>3</sub>):  $\delta$  9.15 (s, 1H), 7.26 (s, 1H), 7.22 (d,  $J = 8.2$  Hz, 1H), 6.96 (d,  $J = 8.2$  Hz, 1H), 4.24 (m, 4H), 2.25 (s, 3H), 2.20 (m, 2H). <sup>13</sup>C NMR (100 MHz, CDCl<sub>3</sub>):  $\delta$  155.23, 152.14, 150.97, 131.92, 121.64, 121.21, 119.57, 70.63, 70.58, 31.69, 12.28. ESI-TOF MS (positive mode):  $m/z$  calcd. for C<sub>11</sub>H<sub>14</sub>NO<sub>3</sub> [M + H]<sup>+</sup> 208.097, found 208.098.

**Synthesis of authentic samples 4 and 5:** Authentic samples of **4** and **5** were synthesized according to the literature with slight modifications.<sup>[4]</sup> Oxime **2** (1.0 mmol), alkyne **3** (1.3 mmol), [Cp\*RhCl<sub>2</sub>]<sub>2</sub> (12.5 mg, 0.02 mmol) and cesium acetate (58 mg, 0.3 mmol) were dissolved in MeOH (4 mL) and stirred for 12 h at 60 °C. After the extraction with CHCl<sub>3</sub>, the organic layer was washed with NaHCO<sub>3</sub>aq twice and dried *in vacuo*. The residue was purified with silica gel column chromatography (hexane/EtOAc) to obtain both regioisomers **4** and **5**.

**4aa:** <sup>1</sup>H NMR (400 MHz, CDCl<sub>3</sub>): δ 7.63 (d, *J* = 9.0 Hz, 1H), 7.15 (d, *J* = 9.0 Hz, 1H), 5.06 (s, 2H), 4.76 (s, 2H), 4.41 (s, 4H), 3.48 (s, 3H), 3.46 (s, 3H), 2.87 (s, 3H). <sup>13</sup>C NMR (100 MHz, CDCl<sub>3</sub>): δ 157.98, 150.27, 143.59, 138.63, 128.51, 124.09, 123.12, 119.75, 119.49, 74.49, 68.30, 64.34, 64.02, 58.78, 58.41, 23.16. ESI-TOF MS (positive mode): *m/z* calcd. for C<sub>16</sub>H<sub>20</sub>NO<sub>4</sub> [M + H]<sup>+</sup> 290.139, found 290.134.

**4bb:** <sup>1</sup>H NMR (400 MHz, CDCl<sub>3</sub>): δ 7.83 (d, *J* = 8.8 Hz, 1H), 7.14–7.30 (m, 11H), 5.84 (s, 2H), 3.00 (s, 3H). <sup>13</sup>C NMR (100 MHz, CDCl<sub>3</sub>): δ 157.92, 150.36, 147.76, 141.85, 141.01, 138.58, 131.33, 130.35, 127.63, 127.21, 126.96, 126.92, 124.94, 123.41, 122.68, 121.07, 111.01, 101.56, 23.58. ESI-TOF MS (positive mode): *m/z* calcd. for C<sub>23</sub>H<sub>18</sub>NO<sub>2</sub> [M + H]<sup>+</sup> 340.133, found 340.138.

**4cb:** <sup>1</sup>H NMR (400 MHz, CDCl<sub>3</sub>): δ 7.85 (d, *J* = 8.8 Hz, 1H), 7.30 (d, *J* = 8.8 Hz, 1H), 7.11–7.22 (m, 11H), 4.16 (t, *J* = 5.2 Hz, 2H), 3.32 (t, *J* = 5.2 Hz, 2H), 3.00 (s, 3H), 1.96 (quin, *J* = 5.2 Hz, 2H). <sup>13</sup>C NMR (100 MHz, CDCl<sub>3</sub>): δ 157.18, 153.03, 151.89, 146.82, 141.67, 141.59, 131.40, 130.40, 130.22, 127.48, 127.41, 126.83, 126.62, 125.74, 124.46, 123.08, 121.82, 71.22, 70.45, 31.64, 23.24. ESI-TOF MS (positive mode): *m/z* calcd. for C<sub>25</sub>H<sub>22</sub>NO<sub>2</sub> [M + H]<sup>+</sup> 368.165, found 368.171.

**5cb:** <sup>1</sup>H NMR (400 MHz, CDCl<sub>3</sub>): δ 7.73 (s, 1H), 7.30–7.34 (m, 5H), 7.15–7.20 (m, 6H), 4.33 (t, *J* = 5.6 Hz, 2H), 4.28 (t, *J* = 5.6 Hz, 2H), 2.96 (s, 3H), 2.26 (quin, *J* = 5.6 Hz, 2H). <sup>13</sup>C NMR (100 MHz, CDCl<sub>3</sub>): δ 156.41, 154.44, 151.26, 148.77, 141.24, 137.88, 133.82, 131.41, 130.35, 128.37, 127.69, 127.20, 126.91, 123.62, 116.45, 116.11, 70.77, 70.54, 31.35, 22.88. ESI-TOF MS (positive mode): *m/z* calcd. for C<sub>25</sub>H<sub>22</sub>NO<sub>2</sub> [M + H]<sup>+</sup> 368.165, found 368.173.

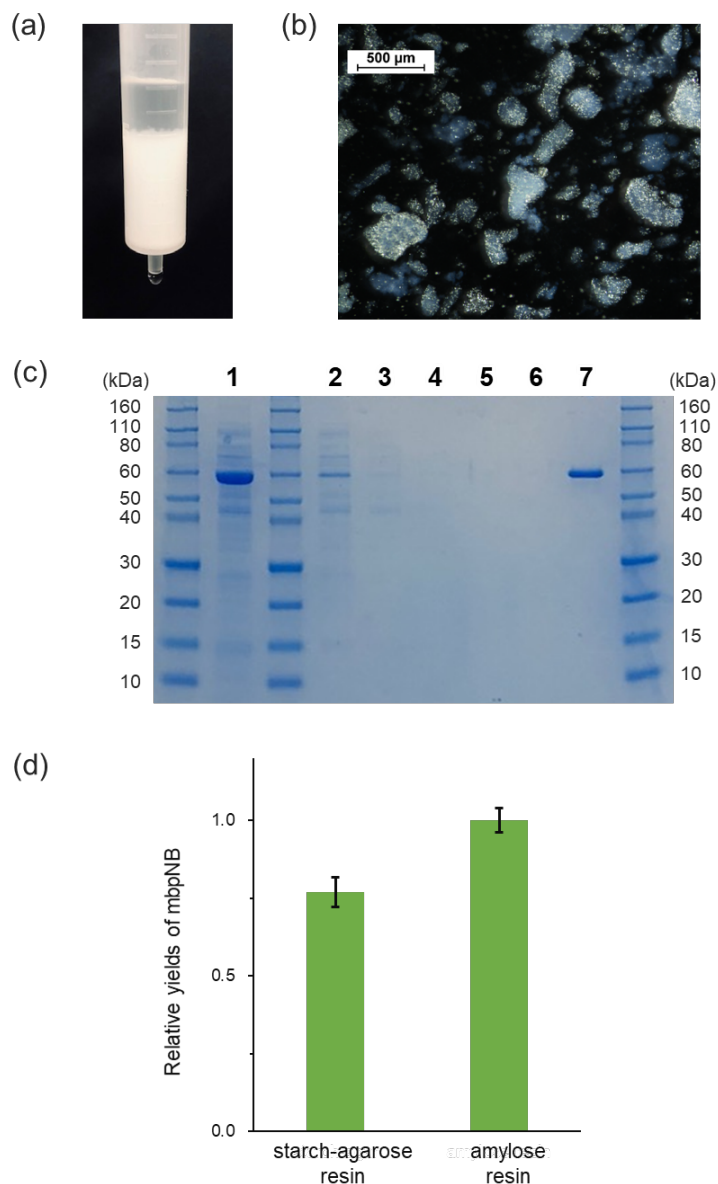

**Figure S1.** (a) A photograph of starch-agarose resin. (b) An optical microscope image of starch-agarose. (c) SDS-PAGE analysis for the purification of mbpNB using starch-agarose resin. mbpNB is a fusion protein of NB with the MBP-tag (mbpNB: 61 kDa). Lane 1: crude cell lysate, lanes 2–6: Eluted fractions from the starch-agarose resin washed with an AcOH-MES buffer solution, and lane 7: First fraction eluted with AcOH-MES buffer containing 25 mM maltose. (d) Relative yields of mbpNB purified using the starch-agarose resin and commercially available amylose resin (New England Biolabs Japan).

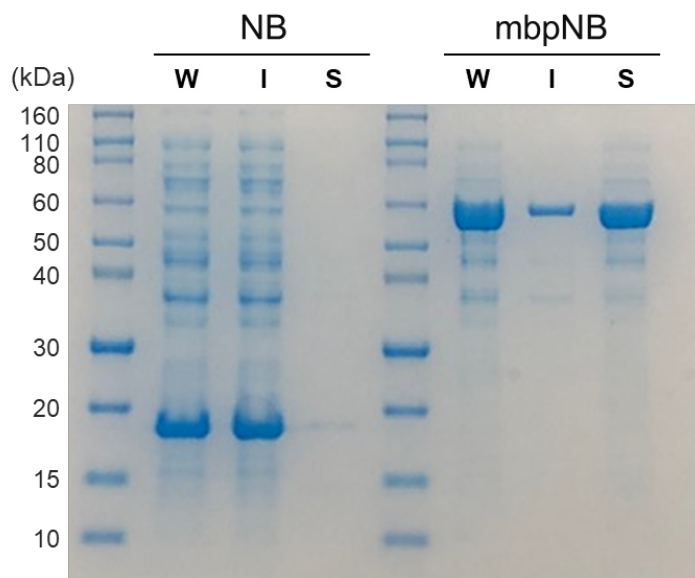

**Figure S2.** SDS-PAGE analysis of soluble and insoluble fractions of *E. coli* cells expressing NB or mbpNB (W: whole cell lysate, I: insoluble fraction, S: soluble fraction). mbpNB is a fusion protein of NB with the MBP-tag (NB: 19 kDa, mbpNB: 61 kDa). The fractions were prepared using the standard procedure in the HTS. *E. coli* cells were lysed with lysozyme (5.0 ng) and benzonase<sup>®</sup> nuclease (1.25 U) in 155  $\mu$ L of KPi buffer (20 mM KPi, 200 mM NaCl, pH 7.0) at 37 °C for 1 h.



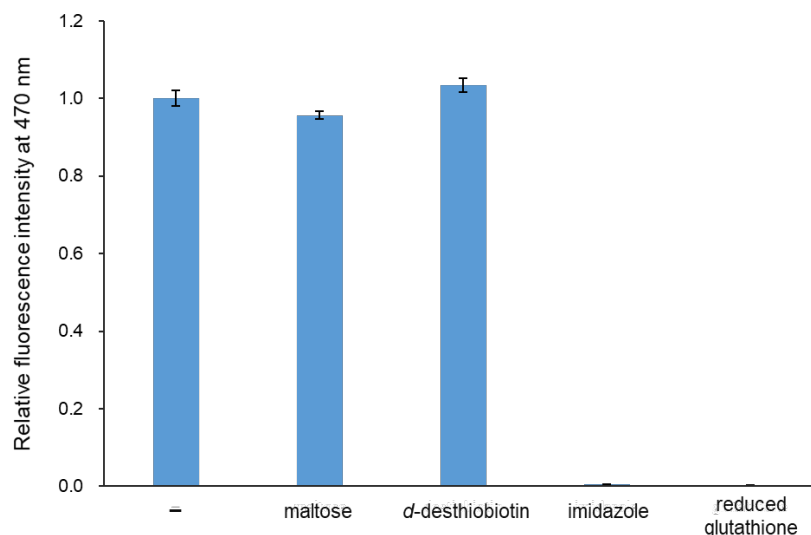

**Figure S3.** Cycloaddition reaction of **2a** with **3a** in the presence of maltose, *d*-desthiobiotin, imidazole, and reduced glutathione. Progress of the reaction was monitored by fluorescence intensity at 470 nm derived from product **4aa**. Maltose, *d*-desthiobiotin, imidazole, and reduced glutathione are the reagents commonly used in the elution step of the affinity chromatography for MBP-tag, strep-tag II, His-tag, and GST-tag, respectively. Reaction conditions: **2a** (0.125 mM), **3a** (2.0 mM), Cp\*Rh[S<sub>2</sub>P(OEt)<sub>2</sub>]<sub>2</sub> (20 μM), and AgNO<sub>3</sub> (1.0 mM) in AcOH-MES buffer (100 mM AcOH, 50 mM MES, 2% 1,4-dioxane, pH 5.5) containing maltose (25 mM).

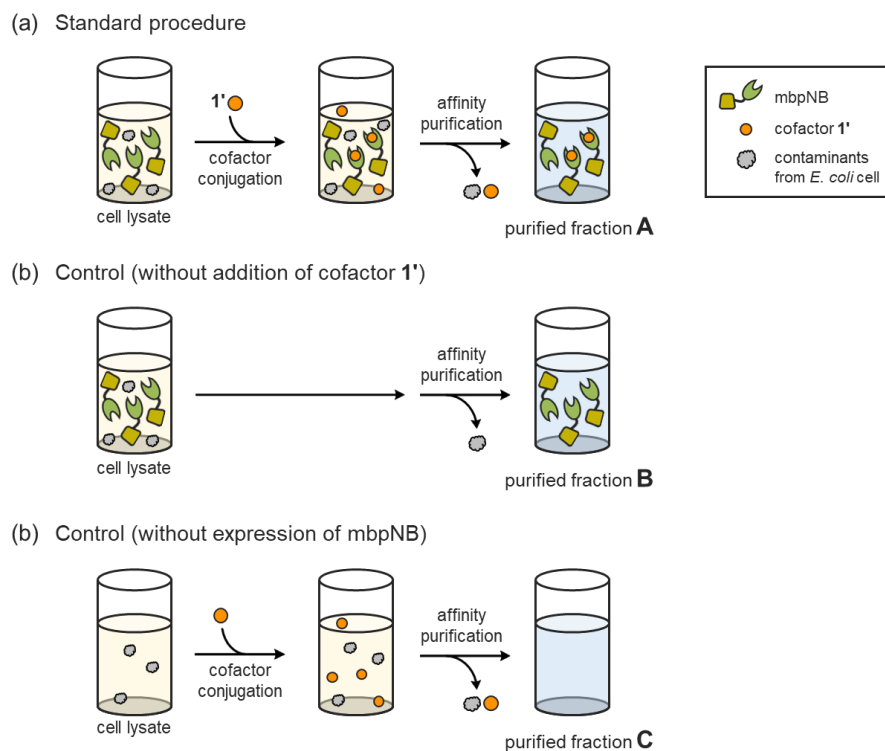

**Figure S4.** Procedures for preparation of the purified fractions A–C used in Figures S5–S8. (a) A standard HTS procedure for the preparation of the biohybrid catalyst mbpNB-1'. mbpNB in the *E. coli* cell lysate was conjugated with cofactor 1' and the conjugate was purified using starch-agarose resin to obtain purified fraction A. (b) A control experiment to obtain purified fraction B. mbpNB in the *E. coli* cell lysate was directly purified by starch-agarose resin without the addition of cofactor 1'. (c) A control experiment to obtain purified fraction C. The lysate of *E. coli* cell without IPTG induction of mbpNB expression was subjected to the process of the cofactor conjugation and the affinity purification.

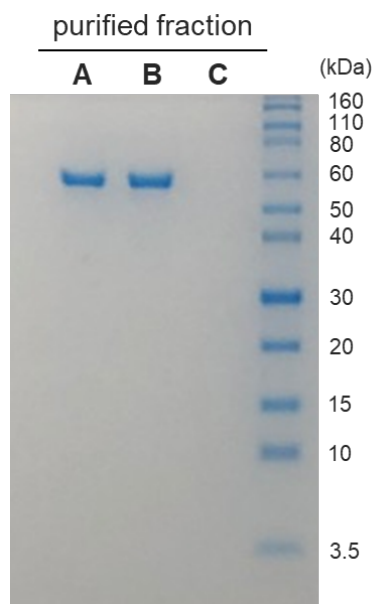

**Figure S5.** SDS-PAGE analysis of the purified fractions A–C prepared as shown in Figure S4. (mbpNB: 61 kDa.)

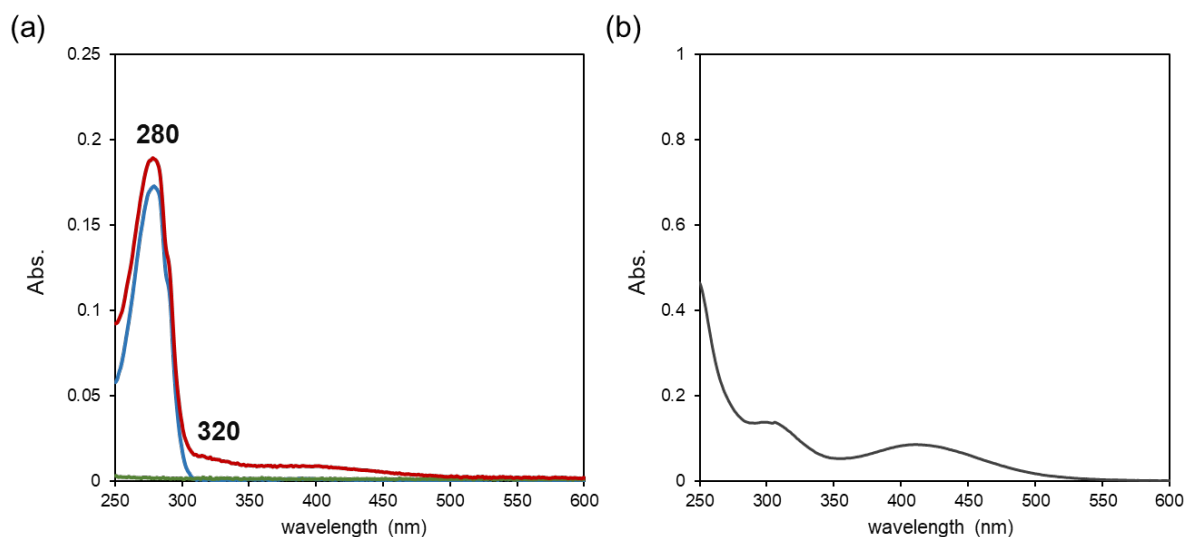

**Figure S6.** (a) UV-vis spectra of the purified fractions A (red), B (blue), and C (green), which are prepared as shown in Figure S4, in AcOH-MES buffer (50 mM MES, 100 mM AcOH, 25 mM maltose, 0.25 wt% SDS, pH 5.5) (b) UV-vis spectrum of cofactor 1' in AcOH-MES buffer (50 mM MES, 100 mM AcOH, 25 mM maltose, pH 5.5).

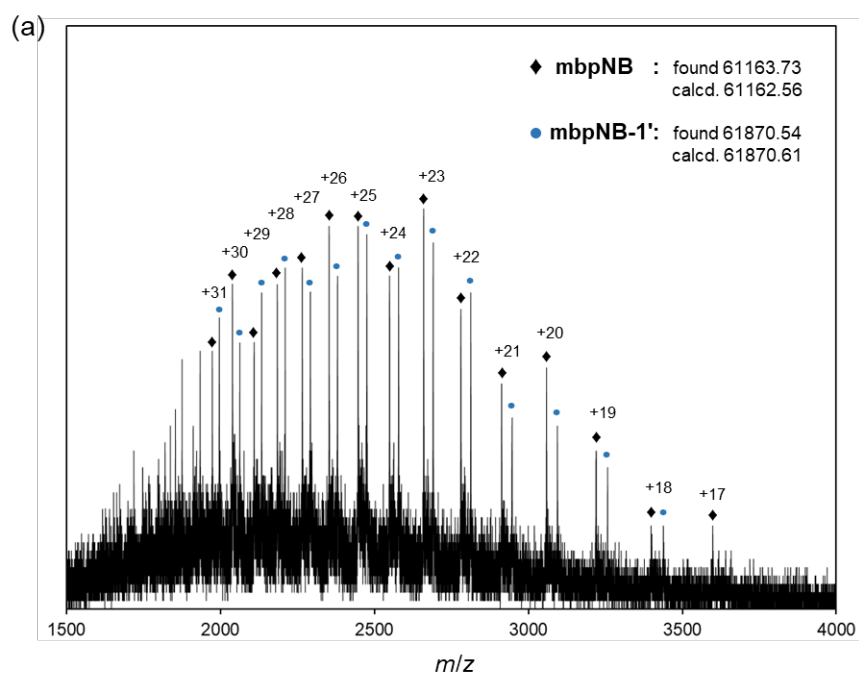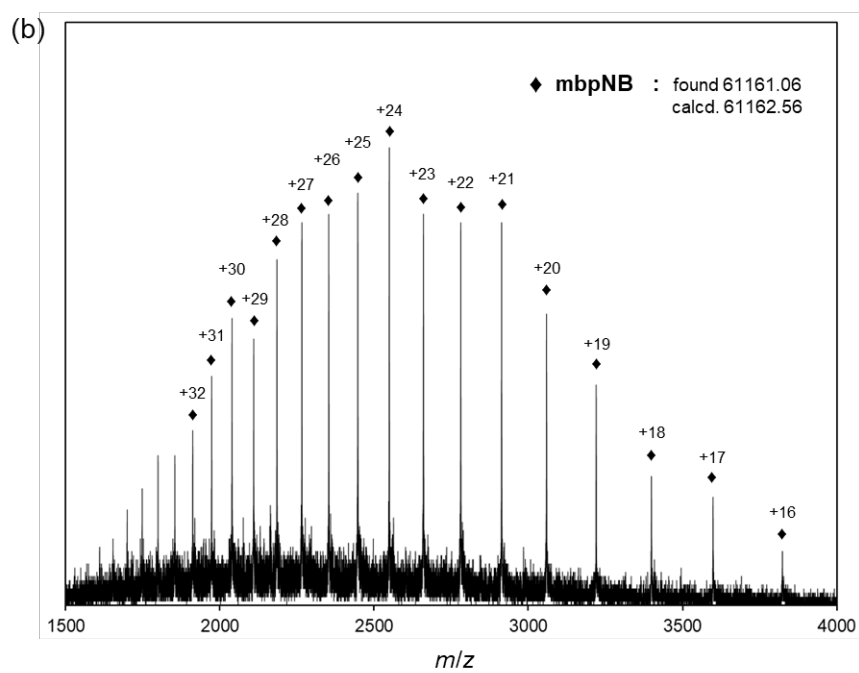

**Figure S7.** ESI-TOF MS of (a) purified fraction **A** and (b) purified fraction **B** prepared as shown in Figure S4.

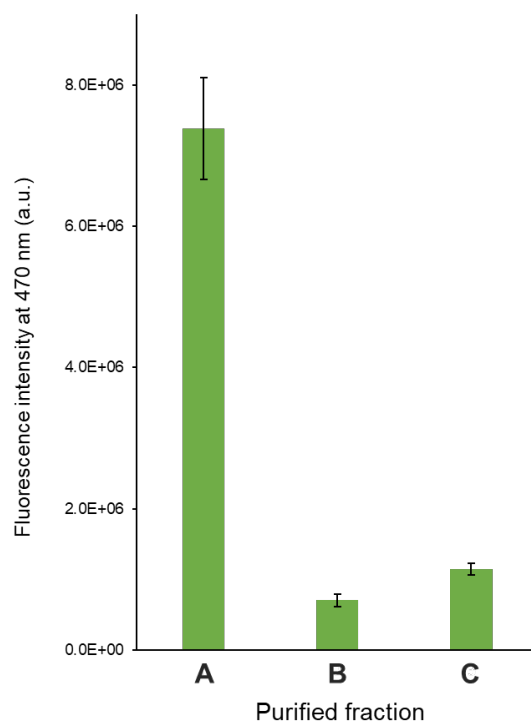

**Figure S8.** Cycloaddition of **2a** with **3a** using the purified fractions **A–C** prepared as shown in Figure S4. Reaction progress was monitored by fluorescence intensity at 470 nm derived from product **4aa**. Reaction conditions: **2a** (0.125 mM), **3a** (2.0 mM) and AgNO<sub>3</sub> (1.0 mM) in maltose elution buffer (25 mM maltose, 100 mM AcOH, 50 mM MES, 2% 1,4-dioxane, pH 5.5) containing mbpNB-1' (c.a. 2 μM) at 37 °C for 72 h.

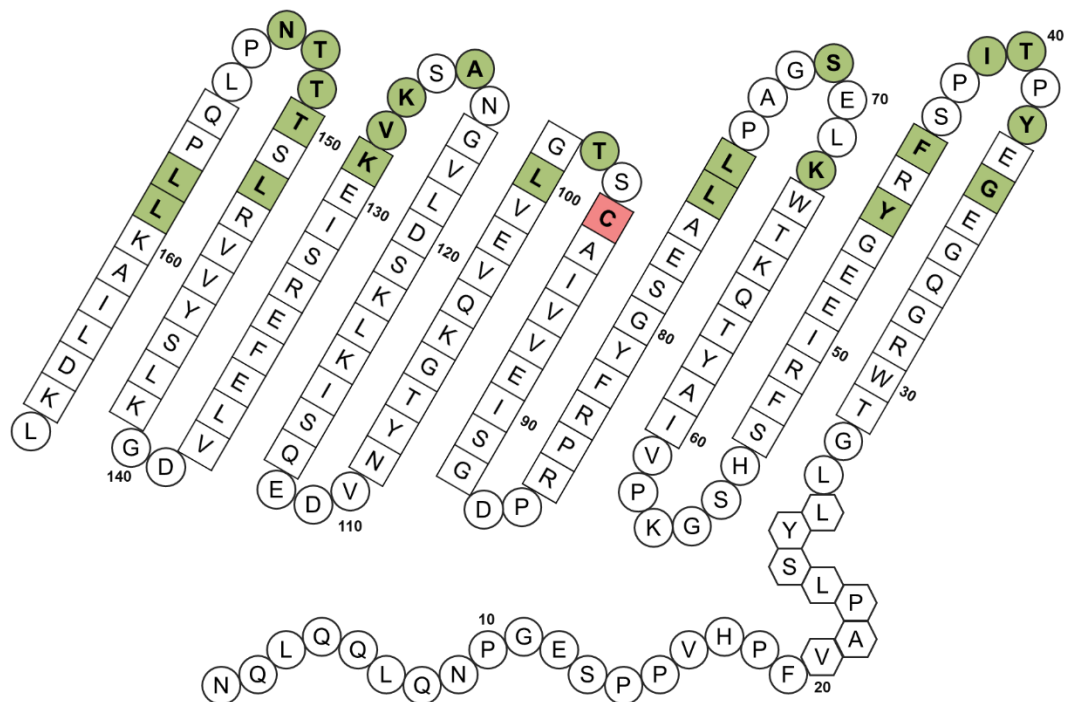

**Figure S9.** A topology model of NB based on the crystal structure (PDB: 3WJB). Residues in the  $\beta$ -strands are shown in squares and residues in the  $\alpha$ -helix structure are shown in hexagons. Cys96 residue is highlighted in red. The twenty-three positions subjected to site-saturation mutagenesis are highlighted in green.

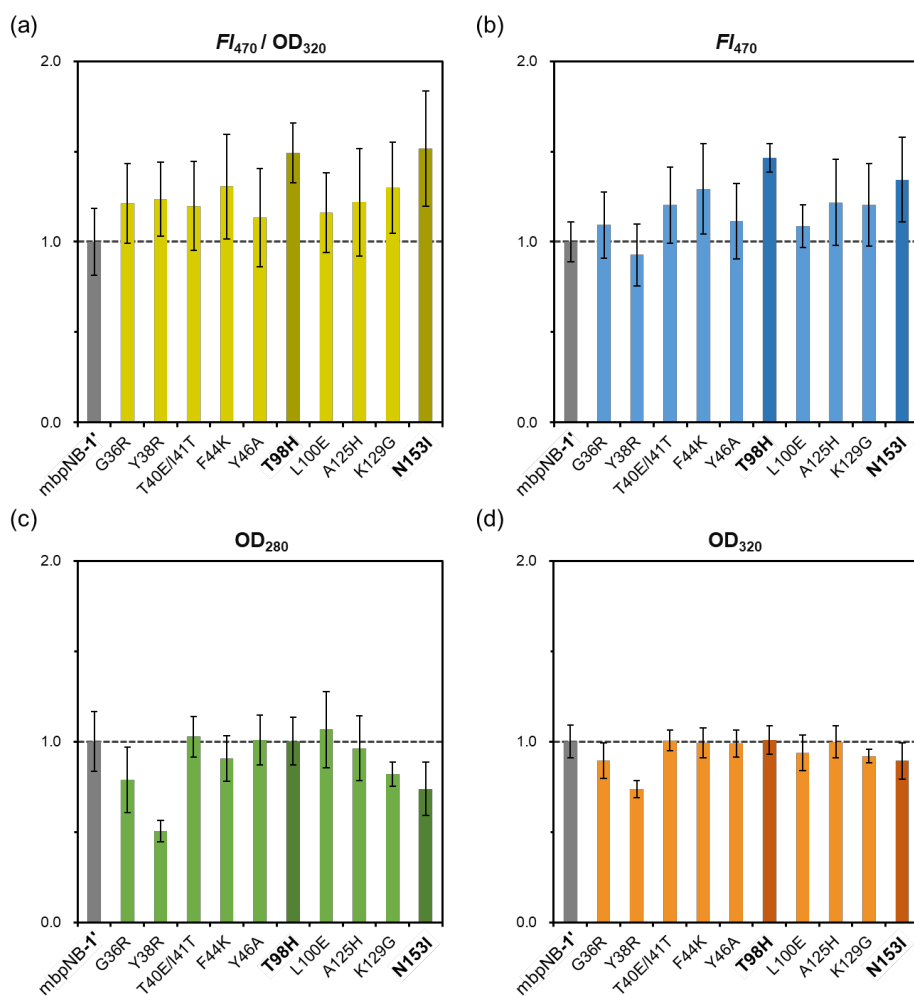

**Figure S10.** mbpNB-1' variants identified in the first round of directed evolution. (a) Relative catalytic activity of the mbpNB-1' variants based on  $FI_{470}/OD_{320}$ . (b) Relative fluorescence intensity at 470 nm of reaction mixture (**2a** + **3a**). (c) Relative absorbance at 280 nm of the purified fraction containing each mbpNB-1' variant. (d) Relative absorbance at 320 nm of the purified fraction containing each mbpNB-1' variant.

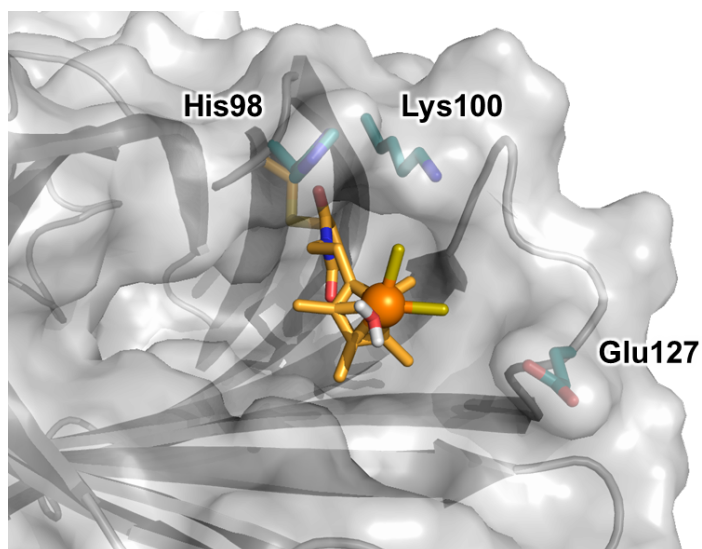

**Figure S11.** An MD structure of Cp\*Rh(III)-linked NB(T98H/L100K/K127E). The MD calculation was carried out based on the crystal structure of NB (PDB: 3WJB). Two dithiophosphate ligands of cofactor **1** were substituted with two chloride ions and one water molecule. His98, Lys100 and Glu127 are highlighted as green sticks.



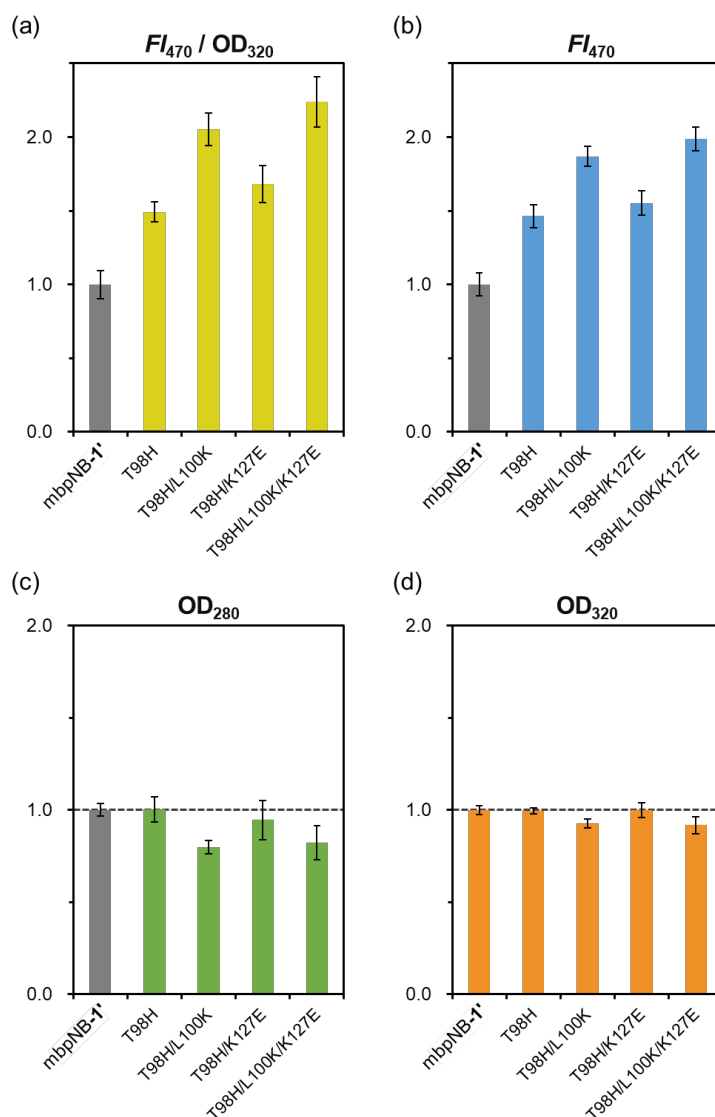

**Figure S12.** mbpNB-1' variants identified through the three rounds of directed evolution. (a) Relative catalytic activity of the mbpNB-1' variants based on  $FI_{470}/OD_{320}$ . (b) Relative fluorescence intensity at 470 nm ( $FI_{470}$ ) of reaction mixture (**2a** + **3a**). (c) Relative absorbance at 280 nm ( $OD_{280}$ ) of the purified fraction containing each mbpNB-1' variant. (d) Relative absorbance at 320 nm ( $OD_{320}$ ) of the purified fraction containing each mbpNB-1' variant.

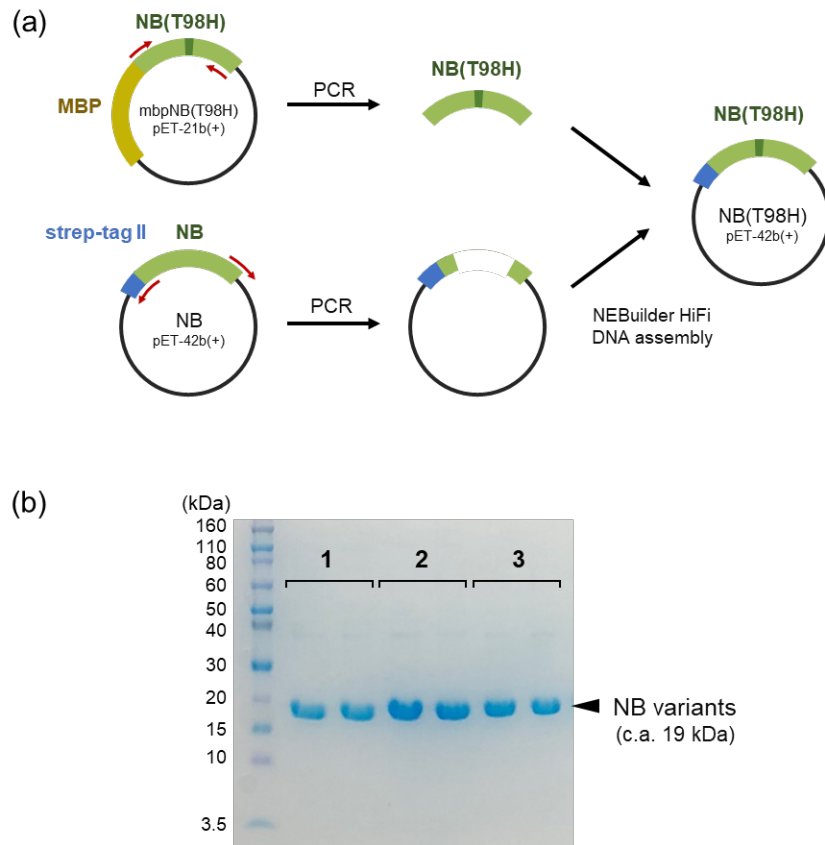

**Figure S13.** (a) Schematic illustration of the subcloning of an NB(T98H) gene into pET42b(+) vector with a strep-tag II gene based on NEBuilder HiFi DNA assembly technique. (b) SDS-PAGE analysis of the purified NB variants with strep-tag II. Lanes 1: NB(T98H), lanes 2: NB(T98H/L100K), lanes 3: NB(T98H/L100K/K127E).

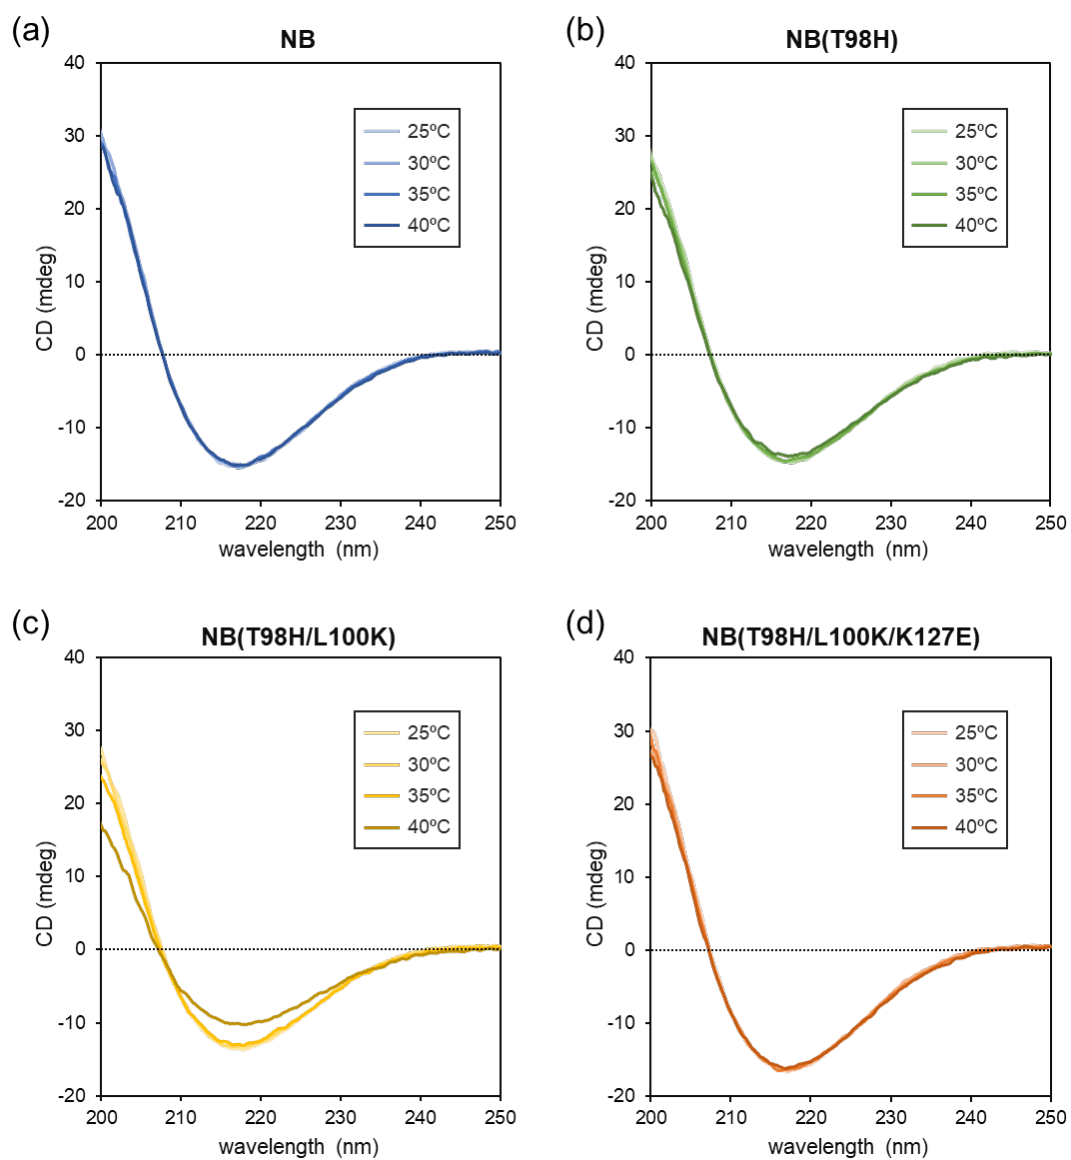

**Figure S14.** CD spectra of the purified NB variants in KPi buffer (10 mM KPi, pH 7.0). (a) NB, (b) NB(T98H), (c) NB(T98H/L100K), and (d) NB(T98H/L100K/K127E).

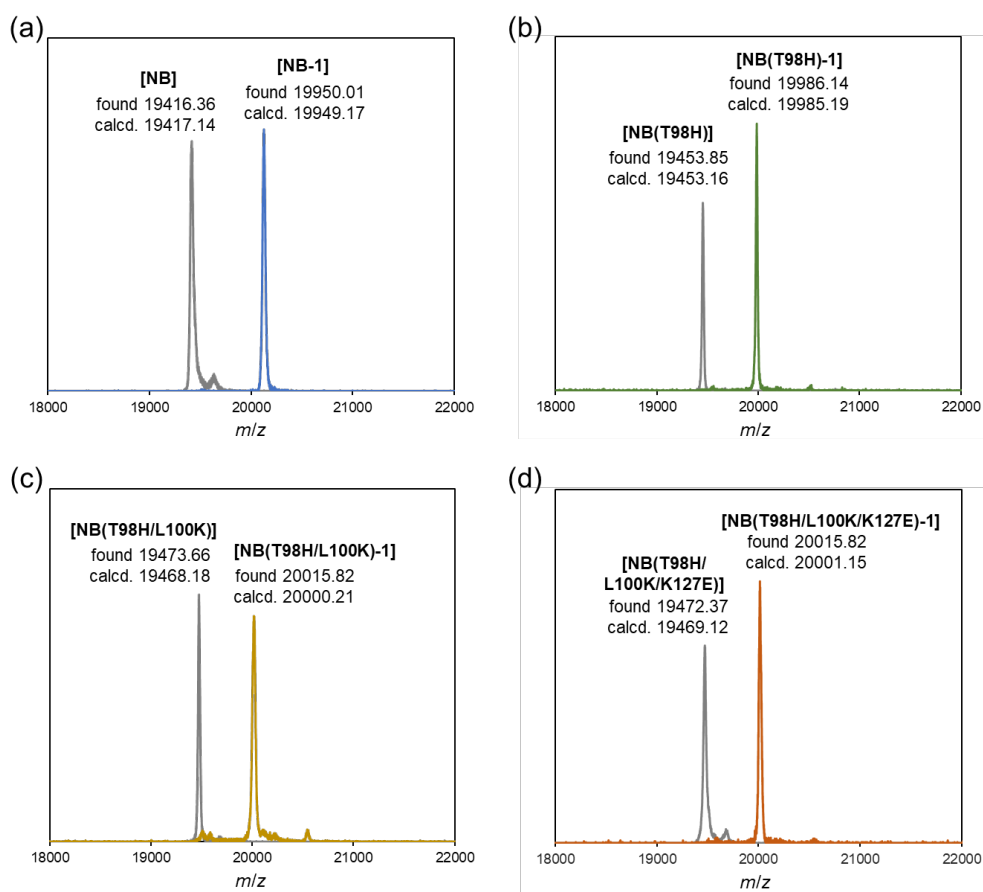

**Figure S15.** MALDI-TOF MS of (a) NB (gray) and NB-1 (blue), (b) NB(T98H) (gray) and NB(T98H)-1 (green), (c) NB(T98H/L100K) (gray) and NB(T98H/L100K)-1 (yellow), and (d) NB(T98H/L100K/K127E) (gray) and NB(T98H/L100K/K127E)-1 (orange).

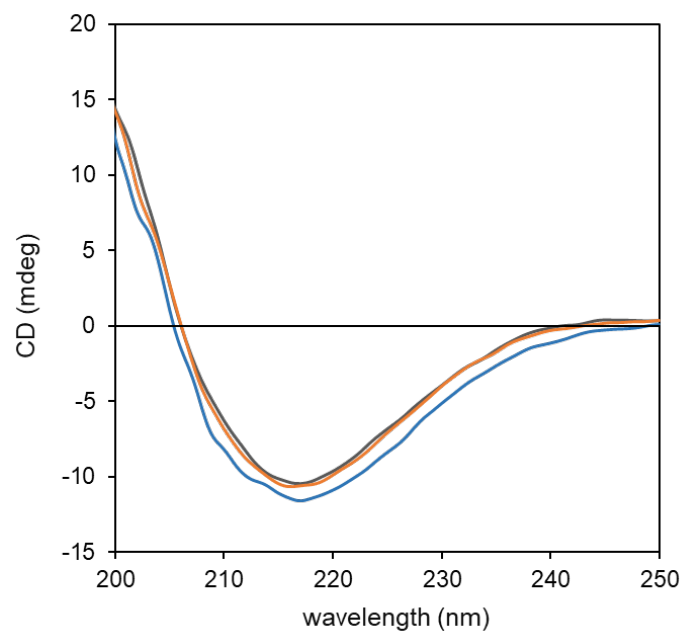

**Figure S16.** CD spectra of NB-1 in AcOH buffer (gray), NB-1 in AcOH buffer containing 2.0 v/v% of 1,4-dioxane (orange), and NB-1 in AcOH buffer containing 20 v/v% of THF (blue).

**Table S1. Preparation Cost for 50 mL of Starch-Agarose Resin<sup>a</sup>**

| Chemicals      | Price (JPY)       | Required Amounts | Cost (JPY)         |
|----------------|-------------------|------------------|--------------------|
| agarose        | 86,500<br>(500 g) | 1.6 g            | 276.8              |
| soluble starch | 1,750<br>(500 g)  | 0.6 g            | 2.1                |
| NaCl           | 2,000<br>(500 g)  | 0.36 g           | 1.4                |
| paraffin oil   | 7,040<br>(500 mL) | 70 mL            | 985.6              |
| Tween 80       | 2,700<br>(500 mL) | 2.1 mL           | 11.3               |
|                |                   |                  | Total: 1,277 (JPY) |

<sup>a</sup>In the high-throughput screening for a biohybrid catalyst, c.a. 50 mL starch-agarose resin was packed into one 96-well filter plate (0.50 mL per each well).

**Table S2. Degenerate Codons and Amino Acids Encoded**

| entry | Codons <sup>a</sup> | Amino acids encoded |
|-------|---------------------|---------------------|
| 1     | NHN                 | ANDQEHILKMFPSTYV    |
| 2     | VNN                 | ARNDQEGHILKMPSTV    |
| 3     | TGG                 | W                   |

(N = A/C/G/T, H = A/C/T, V = A/C/G, K = G/T)

<sup>a</sup>Three oligonucleotide primers containing NHN, VNN, and TGG codons were mixed in a ratio of 10:10:1 and used for site-saturation mutagenesis.

**Table S3. Cycloaddition of 2a with 3a Catalyzed by NB-1 Variants<sup>a</sup>**

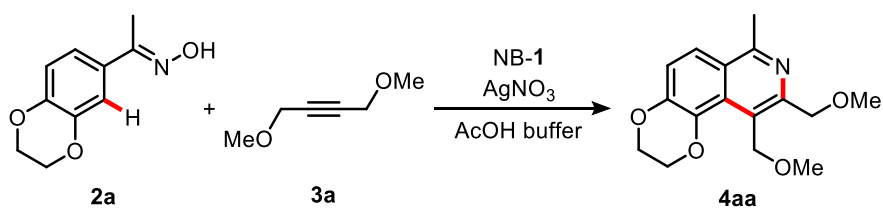

| entry | Catalyst               | Yield (%) <sup>b</sup> |
|-------|------------------------|------------------------|
| 1     | NB-1                   | < 1.0                  |
| 2     | NB(T98H)-1             | 3.4 ± 0.1              |
| 3     | NB(T98H/L100K)-1       | 3.6 ± 0.2              |
| 4     | NB(T98H/L100K/K127E)-1 | 4.2 ± 0.1              |

<sup>a</sup>Reaction conditions: NB-1 variants (20 μM), **2a** (0.125 mM), **3a** (2.0 mM) and AgNO<sub>3</sub> (0.1 mM) in AcOH buffer (100 mM AcOH, 20% THF, pH 4.0), 25°C, 48 h. <sup>b</sup>Yields of product **4aa** were determined by GC-MS.

## DNA and Amino Acid Sequence

### **NB:**

ATGTGGAGCCACCCGCAGTTCGAAAAAATCAACTGCAACAACCTGCAAAATCCGGGCG  
AGAGTCCGCCGGTTCATCCGTTTCGTGGCACCGCTGTCCTATCTGCTGGGTACCTGGCGCG  
GCCAGGGTGAAGGCGAGTATCCGACCATTCCGAGCTTTCGCTATGGCGAAGAGATCCGT  
TTCAGCCATTCGGGTAAACCGGTGATTGCCTATACCCAAAAAACGTGGAACTGGAATC  
GGGTGCACCGCTGCTGGCAGAGAGTGGTTATTTTCGCCCGCGTCCGGATGGTTCTATTG  
AAGTGGTTATCGCATGCTCGACCGGTCTGGTGGAAGTTCAAAAAGGCACGTATAATGTG  
GATGAGCAGAGTATTAAACTGAAATCTGACCTGGTGGGCAACGCGTCCAAAGTTAAAG  
AAATCAGCCGCGAATTCGAGCTGGTTGACGGTAAACTGAGTTATGTGGTTCGTCTGAGC  
ACGACCACGAATCCGCTGCAACCGCTGCTGAAAGCCATCCTGGACAAACTG

(blue: Strep-tag II, black: NB)

MWSHPQFEKNQLQQLQNPGESPPVHPFVAPLSYLLGTWRGQGEGEYPTIPSFYRGEEIRFSH  
SGKPVIAYTQKTWKLESGAPLLAESGYFRPRPDGSIEVVIACSTGLVEVQKGTYNVDEQSIKL  
KSDLVGNASKVKEISREFELVDGKLSYVVRLSTTTNPLQPLLKAILDKL

(blue: Strep-tag II, black: NB)

### **mbpNB:**

ATGAAAATCGAAGAAGGTAAACTGGTAATCTGGATTAACGGCGATAAAGGCTATAACG  
GTCTCGCTGAAGTCGGTAAGAAATTCGAGAAAGATAACCGGAATTAAGTACCCGTTGAG  
CATCCGGATAAACTGGAAGAGAAATTCACAGGTTGCGGCAACTGGCGATGGCCCTG  
ACATTATCTTCTGGGCACACGACCGCTTTGGTGGCTACGCTCAATCTGGCCTGTTGGCTG  
AAATCACCCCGGACAAAGCGTTCAGGACAAGCTGTATCCGTTTACCTGGGATGCCGTA  
CGTTACAACGGCAAGCTGATTGCTTACCCGATCGCTGTTGAAGCGTTATCGCTGATTTAT  
AACAAAGATCTGCTGCCGAACCCGCCAAAAACCTGGGAAGAGATCCCGGCGCTGGATA  
AAGAACTGAAAGCGAAAGGTAAGAGCGCGCTGATGTTCAACCTGCAAGAACCGTACTT  
CACCTGGCCGCTGATTGCTGCTGACGGGGGTTATGCGTTCAAGTATGAAAACGGCAAGT  
ACGACATTAAAGACGTGGGCGTGGATAACGCTGGCGCGAAAGCGGGTCTGACCTTCCTG  
GTTGACCTGATTAAAAACAAACACATGAATGCAGACACCGATTACTCCATCGCAGAAGC  
TGCCTTTAATAAAGGCGAAACAGCGATGACCATCAACGGCCCGTGGGCATGGTCCAACA



TCGACACCAGCAAAGTGAATTATGGTGTAACGGTACTGCCGACCTTCAAGGGTCAACCA  
TCCAAACCGTTCGTTGGCGTGCTGAGCGCAGGTATTAACGCCGCCAGTCCGAACAAAGA  
GCTGGCAAAGAGTTCCTCGAAAACCTATCTGCTGACTGATGAAGGTCTGGAAGCGGTTA  
ATAAAGACAAACCGCTGGGTGCCGTAGCGCTGAAGTCTTACGAGGAAGAGTTGGCGAA  
AGATCCACGTATTGCCGCCACCATGGAAAACGCCAGAAAGGTGAAATCATGCCGAAC  
ATCCCGCAGATGTCCGCTTTCTGGTATGCCGTGCGTACTGCGGTGATCAACGCCGCCAG  
CGGTCGTCAGACTGTCGATGAAGCCCTGAAAGACGCGCAGACTGCAGAAGCAGCAGCA  
AAAGAAGCCGCTGCCAAAGAAGCGGCAGCGAAAGCAAATCAACTGCAACAACCTGCAAA  
ATCCGGGCGAGAGTCCGCCGGTTCATCCGTTTCGTGGCACCGCTGTCCTATCTGCTGGGTA  
CCTGGCGCGGCCAGGGTGAAGGCGAGTATCCGACCATTCCGAGCTTTCGCTATGGCGAA  
GAGATCCGTTTCAGCCATTCGGGTAAACCGGTGATTGCCTATACCCAAAAAACGTGGAA  
ACTGGAATCGGGTGCACCGCTGCTGGCAGAGAGTGGTTATTTTCGCCCGCGTCCGGATG  
GTTCTATTGAAGTGGTTATCGCATGCTCGACCGGTCTGGTGGAAAGTTCAAAAAGGCACG  
TATAATGTGGATGAGCAGAGTATTAAACTGAAATCTGACCTGGTGGGCAACGCGTCCAA  
AGTTAAAGAAATCAGCCGCGAATTCGAGCTGGTTGACGGTAAACTGAGTTATGTGGTTC  
GTCTGAGCACGACCACGAATCCGCTGCAACCGCTGCTGGAAGCCATCCTGGACAAACTG  
TGGAGCCACCCGCAGTTCGAAAAA

(yellow: MBP-tag, green:  $\alpha$ -helix linker, blue: Strep-tag II, black: NB)

MKIEEGKLVWINGDKGYNGLAEVGGKFEKDTGIKVTVEHPDKLEEKFPQVAATGDGPDIIF  
WAHDRFGGYAQSGLLAEITPDKAFQDKLYPFTWDAVRYNGKLIAYPIAVEALSLIYNKDLL  
PNPPKTWEEIPALDKELKAKGKSALMFNLQEPYFTWPLIAADGGYAFKYENGGYDIKDVGV  
DNAGAKAGLTFLVDLIKNKHMNADTDYSIAEAAFNKGETAMTINGPWAWSNIDTSKVNYG  
VTVLPTFKGQPSKPFVGVLSAGINAASPNKELAKEFLENYLLTDEGLEAVNKDKPLGAVAL  
KSYEEELAKDPRIAA TMENAQKGEIMPNIQMSAFWYAVRTAVINAASGRQTVDEALKDA  
QTAEAAAKEAAAKEAAAKANQLQQLQNPGESPPVHPFVAPLSYLLGTWRGQGEGEYPTIPS  
FRYGEEIRFSHSGKPVIAYTQKTWKLESGAPLLAESGYFRPRPDGSIEVVIACSTGLVEVQKG  
TYNVDEQSIKLSDLVGNASKVKEISREFELVDGKLSYVVRLSTTTNPLQPLLEAILDKLWS  
HPQFEK

(yellow: MBP-tag, green:  $\alpha$ -helix linker, blue: Strep-tag II, black: NB)

## **Primers for construction of expression plasmid for fusion protein of mbpNB**

*pET-21b(+)* with NB vector, forward primer

5'-GGTAGTGAAAACCTGTACTTCCAGGGTAATCAACTGCAACAACCTGCAAAAATCC-3'

*pET-21b(+)* with NB vector, reverse primer

5'-CATATGTATATCTCCTTCTTAAAGTTAAACAAAATTATTTCTAGAGG-3'

*MBP insert, forward primer*

5'-GGAGATATACATATGAAAATCGAAGAAGGTAAACTGGTAATCTG-3'

*MBP insert, reverse primer*

5'-CAGGTTTTCACTACCACTACCACTACCAGTCTGCGCGTCTTTCAGGG-3'

*pET-21b(+)* vector with NB and MBP, forward primer

5'-AATCAACTGCAACAACCTGC-3'

*pET-21b(+)* vector with NB and MBP, reverse primer

5'-AGTCTGCGCGTCTTTCAG-3'

*α-helix linker insert, forward primer*

5'-CTGAAAGACGCGCAGACTGCAGAAGCAGCAGCAAAAAG-3'

*α-helix linker insert, reverse primer*

5'-GCAGTTGTTGCAGTTGATTTGCTTTCGCTGCCGCTTC-3'

## **Forward and reverse primers for site-saturation mutagenesis**

*G36, forward primer*

5'-GCCAGGGTGAANHNAGTATCCGACCATTC-3'

5'-GCCAGGGTGAAVNNGAGTATCCGACCATTC-3'

5'-GCCAGGGTGAATGGGAGTATCCGACCATTC-3'

*G36, reverse primer*

5'-GAATGGTTCGGATACTCNDNTTCACCCTGGC-3'

5'-GAATGGTTCGGATACTCNNBTTCACCCTGGC-3'

5'-GAATGGTTCGGATACTC**CAA**ATTCACCCTGGC-3'

*Y38, forward primer*

5'-CAGGGTGAAGGCGAG**NHN**CCGACCATTCCGAGC-3'

5'-CAGGGTGAAGGCGAG**VNN**CCGACCATTCCGAGC-3'

5'-CAGGGTGAAGGCGAG**TGG**CCGACCATTCCGAGC-3'

*Y38, reverse primer*

5'-GCTCGGAATGGTCGG**NDN**CTCGCCTTCACCCTG-3'

5'-GCTCGGAATGGTCGG**NNB**CTCGCCTTCACCCTG-3'

5'-GCTCGGAATGGTCGG**CAA**CTCGCCTTCACCCTG-3'

*T40/I41, forward primer*

5'-CAGGGTGAAGGCGAGTATCCG**NHNNHN**CCGAGCTTTCGCTATGG-3'

*T40/I41, reverse primer*

5'-CCATAGCGAAAGCTCGG**NDNNDN**CGGATACTCGCCTTCACCCTG-3'

*F44, forward primer*

5'-GACCATTCCGAGC**NHN**CGCTATGGCGAAGAGATC-3'

5'-GACCATTCCGAGC**VNN**CGCTATGGCGAAGAGATC-3'

5'-GACCATTCCGAGC**TGG**CGCTATGGCGAAGAGATC-3'

*F44, reverse primer*

5'-GATCTCTTCGCCATAGCG**NDN**GCTCGGAATGGTC-3'

5'-GATCTCTTCGCCATAGCG**NNB**GCTCGGAATGGTC-3'

5'-GATCTCTTCGCCATAGCG**CCA**GCTCGGAATGGTC-3'

*Y46, forward primer*

5'-CCATTCCGAGCTTTCGC**NHN**GGCGAAGAGATC-3'

5'-CCATTCCGAGCTTTCGC**VNN**GGCGAAGAGATC-3'

5'-CCATTCCGAGCTTTCGC**TGG**GGCGAAGAGATC-3'

*Y46, reverse primer*

5'-GATCTCTTCGCC**NDN**GCGAAAGCTCGGAATGG-3'

5'-GATCTCTTCGCC**NNB**GCGAAAGCTCGGAATGG-3'

5'-GATCTCTTCGCC**CCA**GCGAAAGCTCGGAATGG-3'

*K68/S71, forward primer*

5'-CCTATACCCAAAAACGTGG**NHN**CTGGA**NHN**GGTGCACCGCTG-3'

*K68/S71, reverse primer*

5'-CAGCGGTGCAC**CNDN**TTCCAG**NDN**CCACGTTTTTTGGGTATAGG-3'

*S71, forward primer*

5'-CGTGGAAACTGGA**NHN**GGTGCACCGCTG-3'

5'-CGTGGAAACTGGA**VNN**GGTGCACCGCTG-3'

5'-CGTGGAAACTGGA**TGG**GGTGCACCGCTG-3'

*S71, reverse primer*

5'-CAGCGGTGCAC**CNDN**TTCCAGTTCCACG-3'

5'-CAGCGGTGCAC**CNBN**TTCCAGTTCCACG-3'

5'-CAGCGGTGCAC**CCA**TTCCAGTTCCACG-3'

*L75/L76, forward primer*

5'-CTGGAATCGGGTGCACCG**NHNNHN**GCAGAGAGTGGTTATTTTCGC-3'

*L75/L76, reverse primer*

5'-GCGAAAATAACCACTCTCTGC**NDNNDN**CGGTGCACCCGATTCCAG-3'

*T98, forward primer*

5'-GGTTATCGCATGCTCG**NHN**GGTCTGGTGGGAAG-3'

5'-GGTTATCGCATGCTCG**VNN**GGTCTGGTGGGAAG-3'

5'-GGTTATCGCATGCTCG**TGG**GGTCTGGTGGGAAG-3'

*T98, reverse primer*

5'-CTTCCACCAGAC**CNDN**CGAGCATGCGATAACC-3'

5'-CTTCCACCAGAC**CNBN**CGAGCATGCGATAACC-3'

5'-CTTCCACCAGAC**CCA**CGAGCATGCGATAACC-3'

*L100, forward primer*

5'-GCATGCTCGACCGGT**NHN**GTGGAAGTTC-3'

5'-GCATGCTCGACCGGT**VNN**GTGGAAGTTC-3'

5'-GCATGCTCGACCGGT**TGG**GTGGAAGTTC-3'

*L100, reverse primer*

5'-GAACTTCCAC**NDN**ACCGGTCGAGCATGC-3'

5'-GAACTTCCAC**NNB**ACCGGTCGAGCATGC-3'

5'-GAACTTCCAC**CCA**ACCGGTCGAGCATGC-3'

*L100 (T98H), forward primer*

5'-GCATGCTCGCACGGT**NHN**GTGGAAGTTC-3'

5'-GCATGCTCGCACGGT**VNN**GTGGAAGTTC-3'

5'-GCATGCTCGCACGGT**TGG**GTGGAAGTTC-3'

*L100 (T98H), reverse primer*

5'-GAACTTCCAC**NDN**ACCGTGCGAGCATGC-3'

5'-GAACTTCCAC**NNB**ACCGTGCGAGCATGC-3'

5'-GAACTTCCAC**CCA**ACCGTGCGAGCATGC-3'

*A125, forward primer*

5'-GACCTGGTGGGCAAC**NHN**TCCAAAGTTAAAG-3'

5'-GACCTGGTGGGCAAC**VNN**TCCAAAGTTAAAG-3'

5'-GACCTGGTGGGCAAC**TGG**TCCAAAGTTAAAG-3'

*A125, reverse primer*

5'-CTTAACTTTGGAN**NDN**GTTGCCACCAGGTC-3'

5'-CTTAACTTTGGAN**NNB**GTTGCCACCAGGTC-3'

5'-CTTAACTTTGGAN**CCA**GTTGCCACCAGGTC-3'

*K127, forward primer*

5'-GTGGGCAACGCGTCC**NHN**GTAAAGAAATCAGC-3'

5'-GTGGGCAACGCGTCC**VNN**GTAAAGAAATCAGC-3'

5'-GTGGGCAACGCGTCC**TGG**GTAAAGAAATCAGC-3'

*K127, reverse primer*

5'-GCTGATTTCTTTAAC**NDN**GGACGCGTTGCCAC-3'

5'-GCTGATTTCTTTAAC**NNB**GGACGCGTTGCCAC-3'

5'-GCTGATTTCTTTAAC**CCA**GGACGCGTTGCCAC-3'

*V128, forward primer*

5'-GCAACGCGTCCAAA**NHN**AAAGAAATCAGCCGCGAATTC-3'

5'-GCAACGCGTCCAAA**VNN**AAAGAAATCAGCCGCGAATTC-3'

5'-GCAACGCGTCCAAA**TGG**AAAGAAATCAGCCGCGAATTC-3'

*V128, reverse primer*

5'-GAATTCGCGGCTGATTTCTTT**NDN**TTTGGACGCGTTGC-3'

5'-GAATTCGCGGCTGATTTCTTT**NNB**TTTGGACGCGTTGC-3'

5'-GAATTCGCGGCTGATTTCTTT**CCA**TTTGGACGCGTTGC-3'

*K129, forward primer*

5'-CAACGCGTCCAAAGTT**NHN**GAAATCAGCCGCGAATTCG-3'

5'-CAACGCGTCCAAAGTT**VNN**GAAATCAGCCGCGAATTCG-3'

5'-CAACGCGTCCAAAGTT**TGG**GAAATCAGCCGCGAATTCG-3'

*K129, reverse primer*

5'-CGAATTCGCGGCTGATTT**NDN**AACTTTGGACGCGTTG-3'

5'-CGAATTCGCGGCTGATTT**NNB**AACTTTGGACGCGTTG-3'

5'-CGAATTCGCGGCTGATTT**CCA**AACTTTGGACGCGTTG-3'

*L148, forward primer*

5'-GAGTTATGTGGTTCGT**NHN**AGCACGACCACGAATC-3'

5'-GAGTTATGTGGTTCGT**VNN**AGCACGACCACGAATC-3'

5'-GAGTTATGTGGTTCGT**TGG**AGCACGACCACGAATC-3'

*L148, reverse primer*

5'-GATTCGTGGTTCGTGCT**NDN**ACGAACCACATAACTC-3'

5'-GATTCGTGGTTCGTGCT**NNB**ACGAACCACATAACTC-3'

5'-GATTCGTGGTTCGTGCT**CCA**ACGAACCACATAACTC-3'

*T150/T151/T152, forward primer*

5'-GTTATGTGGTTCGTCTGAGC**NHNHNHNHN**AATCCGCTGCAACCGC-3'

*T150/T151/T152, reverse primer*

5'-GCGGTTGCAGCGGATT**NDNNDNNDN**NGCTCAGACGAACCACATAAC-3'

*N153, forward primer*

5'-CTGAGCACGACCACG**NHN**CCGCTGCAACCG-3'

5'-CTGAGCACGACCACG**VNN**CCGCTGCAACCG-3'

5'-CTGAGCACGACCACG**TGG**CCGCTGCAACCG-3'

*N153, reverse primer*

5'-CGGTTGCAGCGG**NDN**CGTGGTCGTGCTCAG-3'

5'-CGGTTGCAGCGG**NNB**CGTGGTCGTGCTCAG-3'

5'-CGGTTGCAGCGG**CCA**CGTGGTCGTGCTCAG-3'

*L158, forward primer*

5'-GAATCCGCTGCAACCG**NHN**CTGGAAGCCATCC-3'

5'-GAATCCGCTGCAACCG**VNN**CTGGAAGCCATCC-3'

5'-GAATCCGCTGCAACCG**TGG**CTGGAAGCCATCC-3'

*L158, reverse primer*

5'-GGATGGCTTCCAG**NDN**CGGTTGCAGCGGATTC-3'

5'-GGATGGCTTCCAG**NNB**CGGTTGCAGCGGATTC-3'

5'-GGATGGCTTCCAG**CCA**CGGTTGCAGCGGATTC-3'

*L159, forward primer*

5'-GCAACCGCTG**NHN**GAAGCCATCCTGGAC-3'

5'-GCAACCGCTG**VNN**GAAGCCATCCTGGAC -3'

5'-GCAACCGCTG**TGG**GAAGCCATCCTGGAC -3'

*L159, reverse primer*

5'-GTCCAGGATGGCTTC**NDN**CAGCGGTTGC-3'

5'-GTCCAGGATGGCTTC**NNB**CAGCGGTTGC-3'

5'-GTCCAGGATGGCTTC**CCA**CAGCGGTTGC-3'

**Forward and reverse primers for subcloning of evolved NB gene**

Insert, forward primer

5'-CAACTGCAAAATCCGGGCGAGAGTCC-3'

Insert, reverse primer

5'-GATGGCTTTCAGCAGCGGTTGCAGC -3'

Vector, forward primer

5'-CGCTGCTGAAAGCCATCCTGGACAAACTG-3'

Vector, reverse primer

5'-GCCCCGATTTTGCAGTTGTTGCAGTTG-3'



## NMR spectra

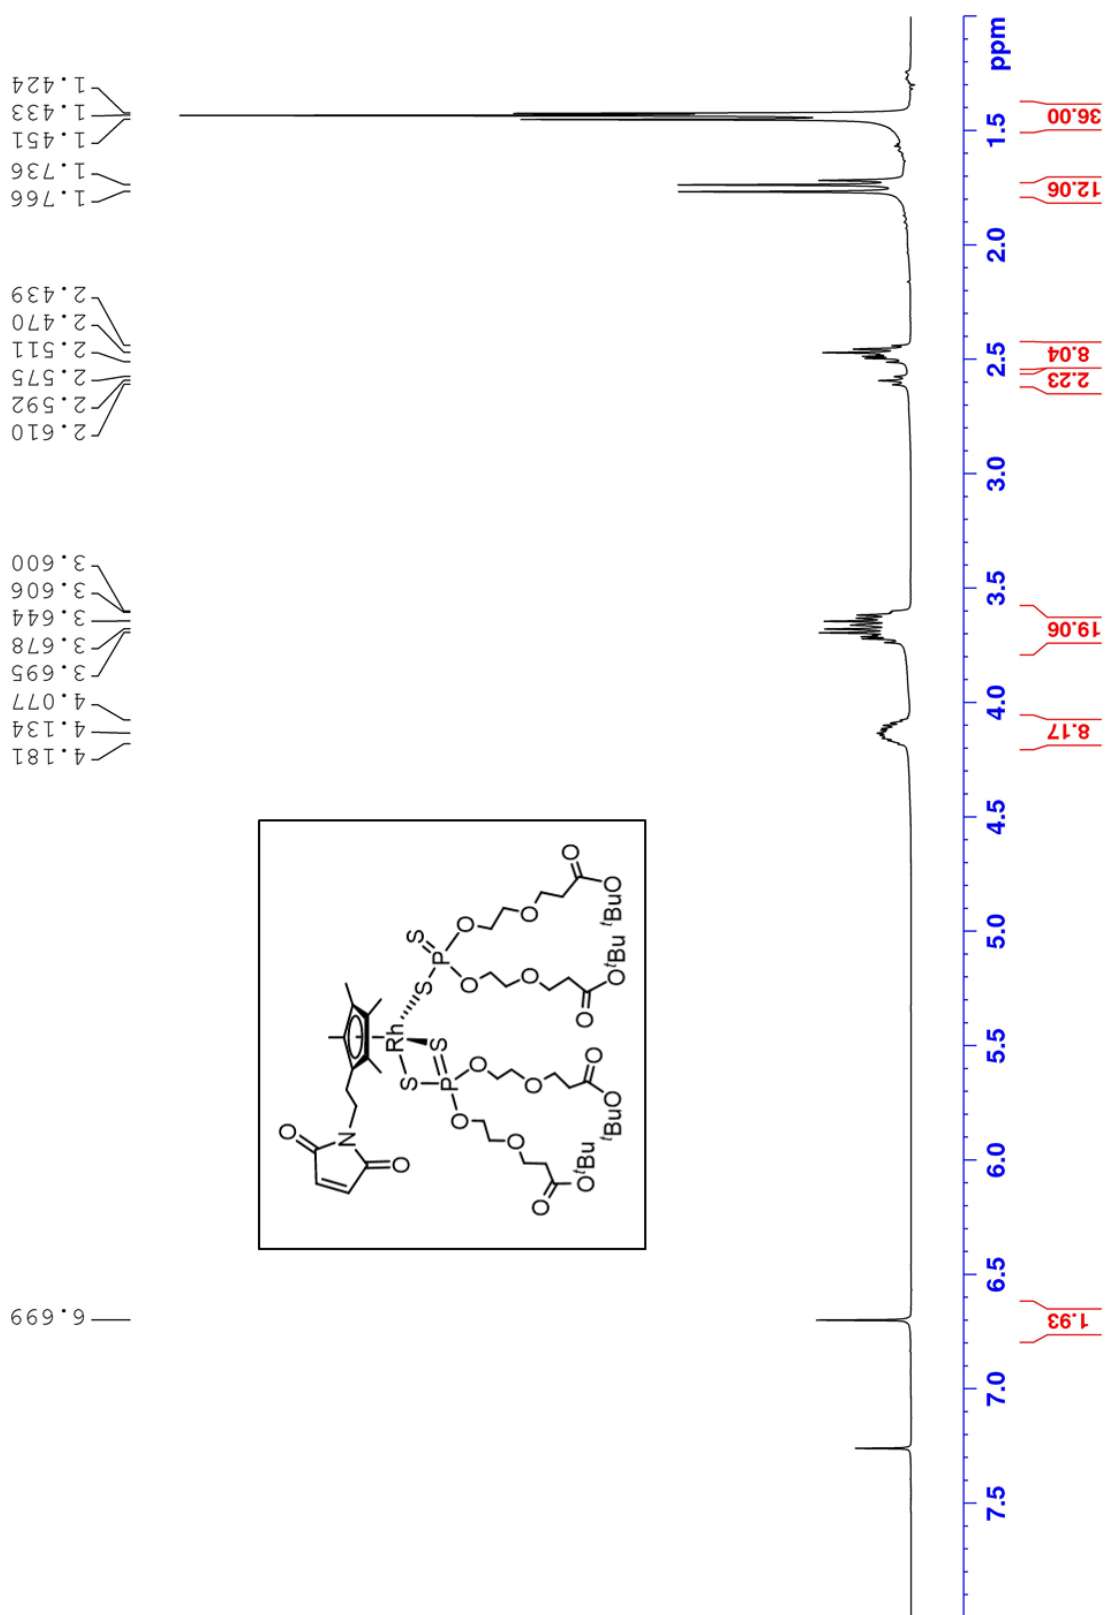

Figure S17.  $^1\text{H}$  NMR spectrum of S3 in  $\text{CDCl}_3$ .

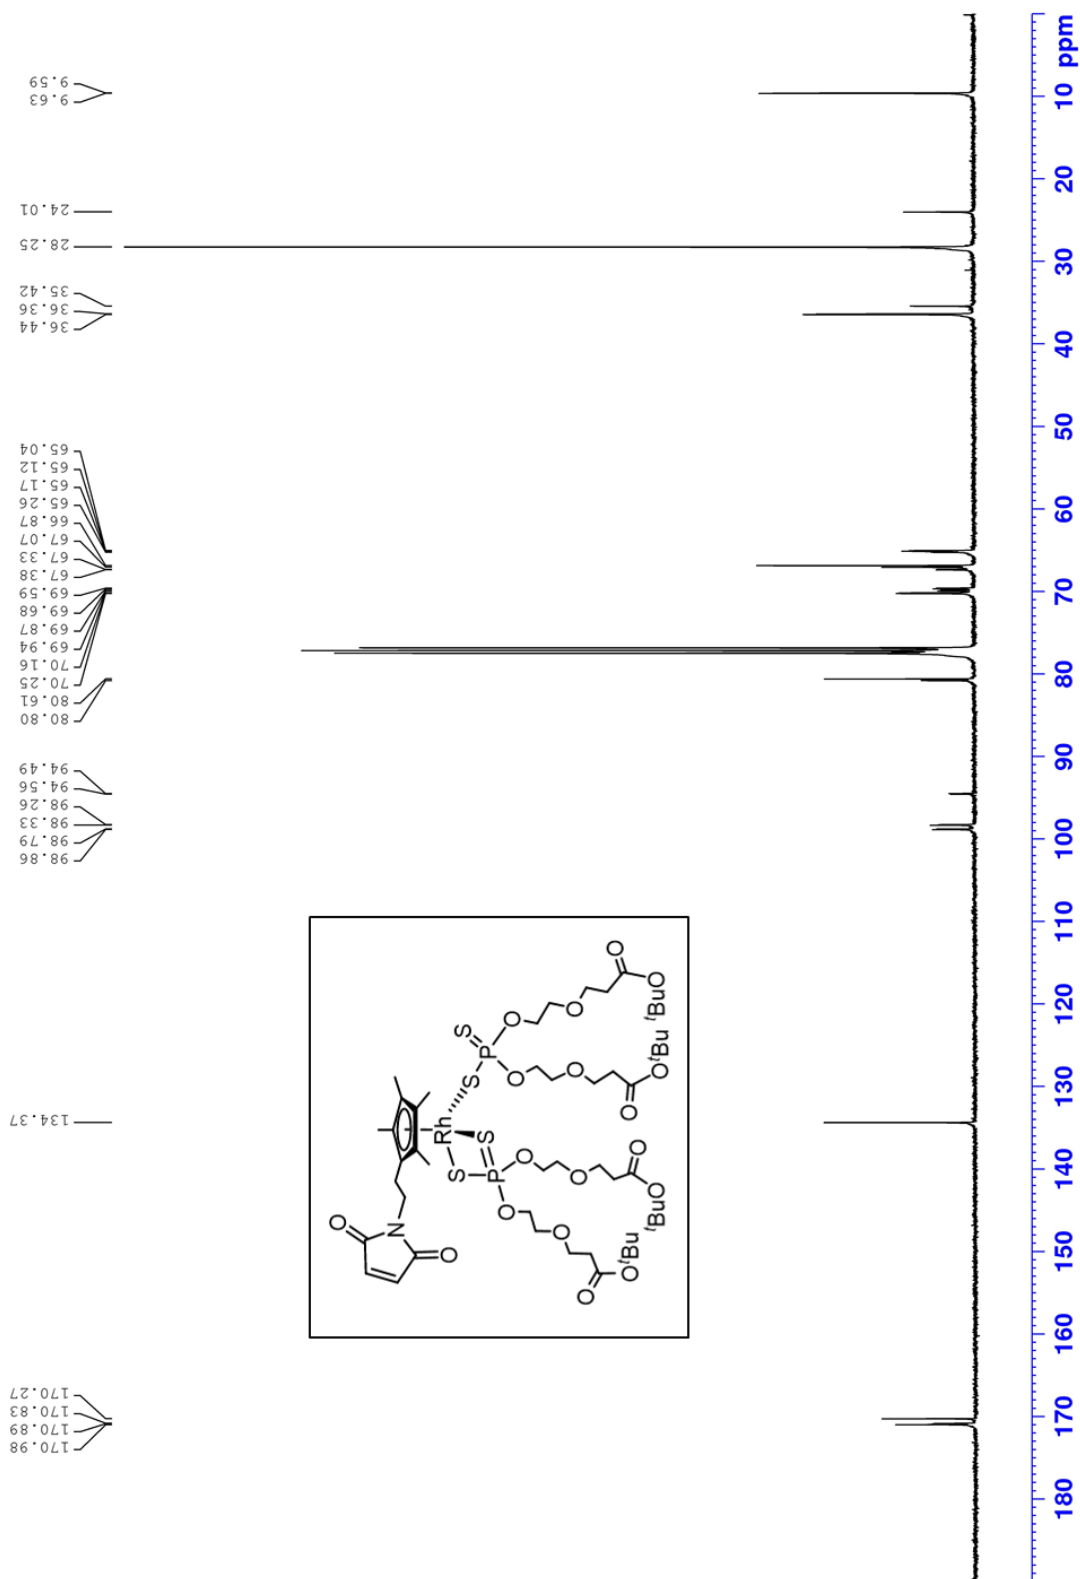

**Figure S18.**  $^{13}\text{C}$  NMR spectrum of S3 in  $\text{CDCl}_3$ .

117.13  
97.17  
97.09

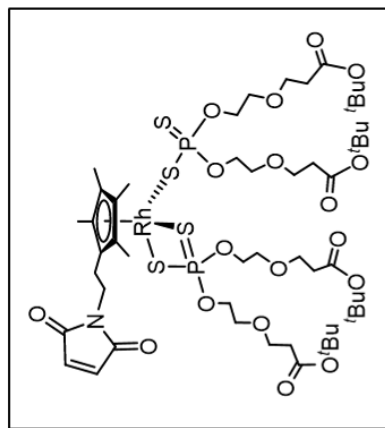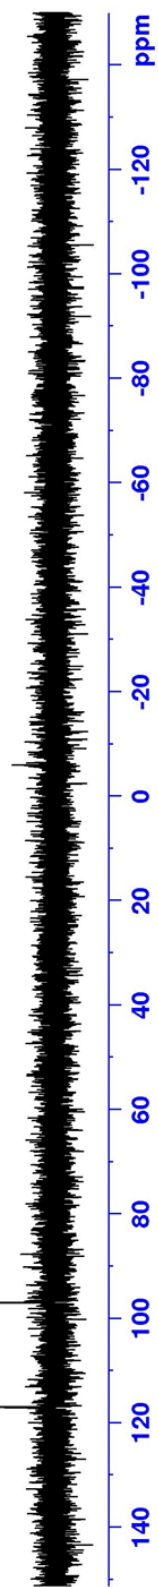

Figure S19. <sup>31</sup>P NMR spectrum of S3 in CDCl<sub>3</sub>.

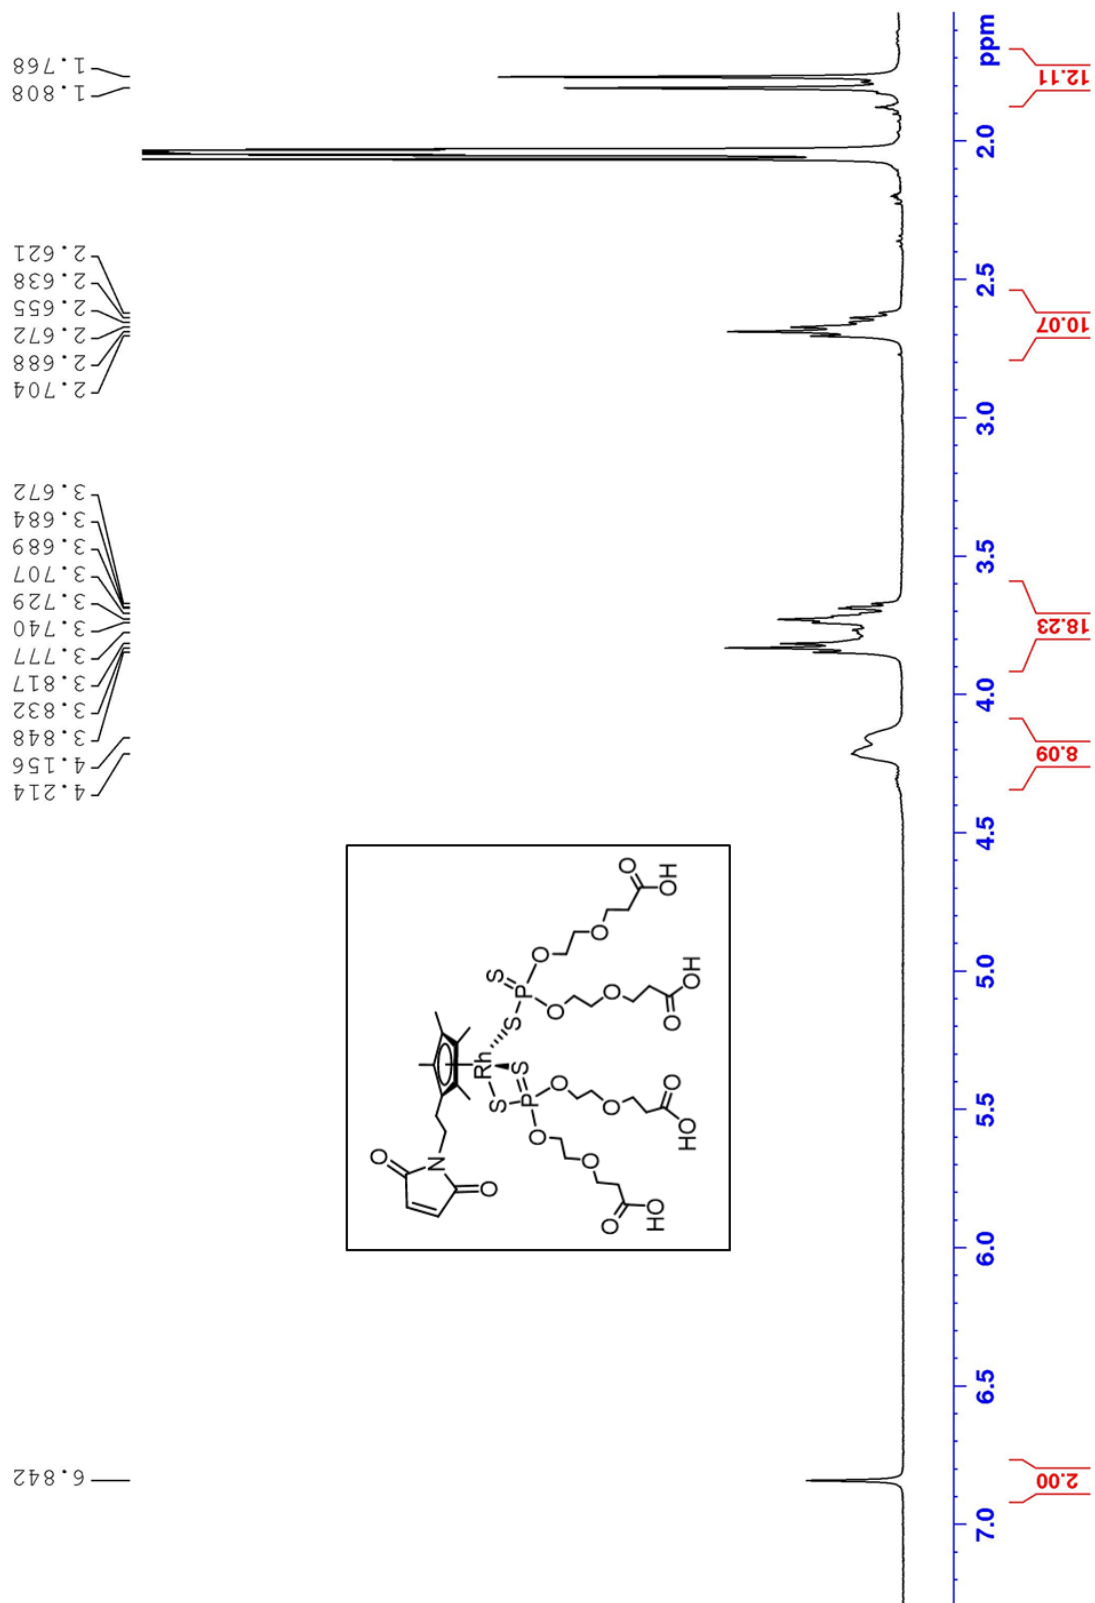

**Figure S20.**  $^1\text{H}$  NMR spectrum of **1'** in  $\text{acetic acid-}d_4$ .

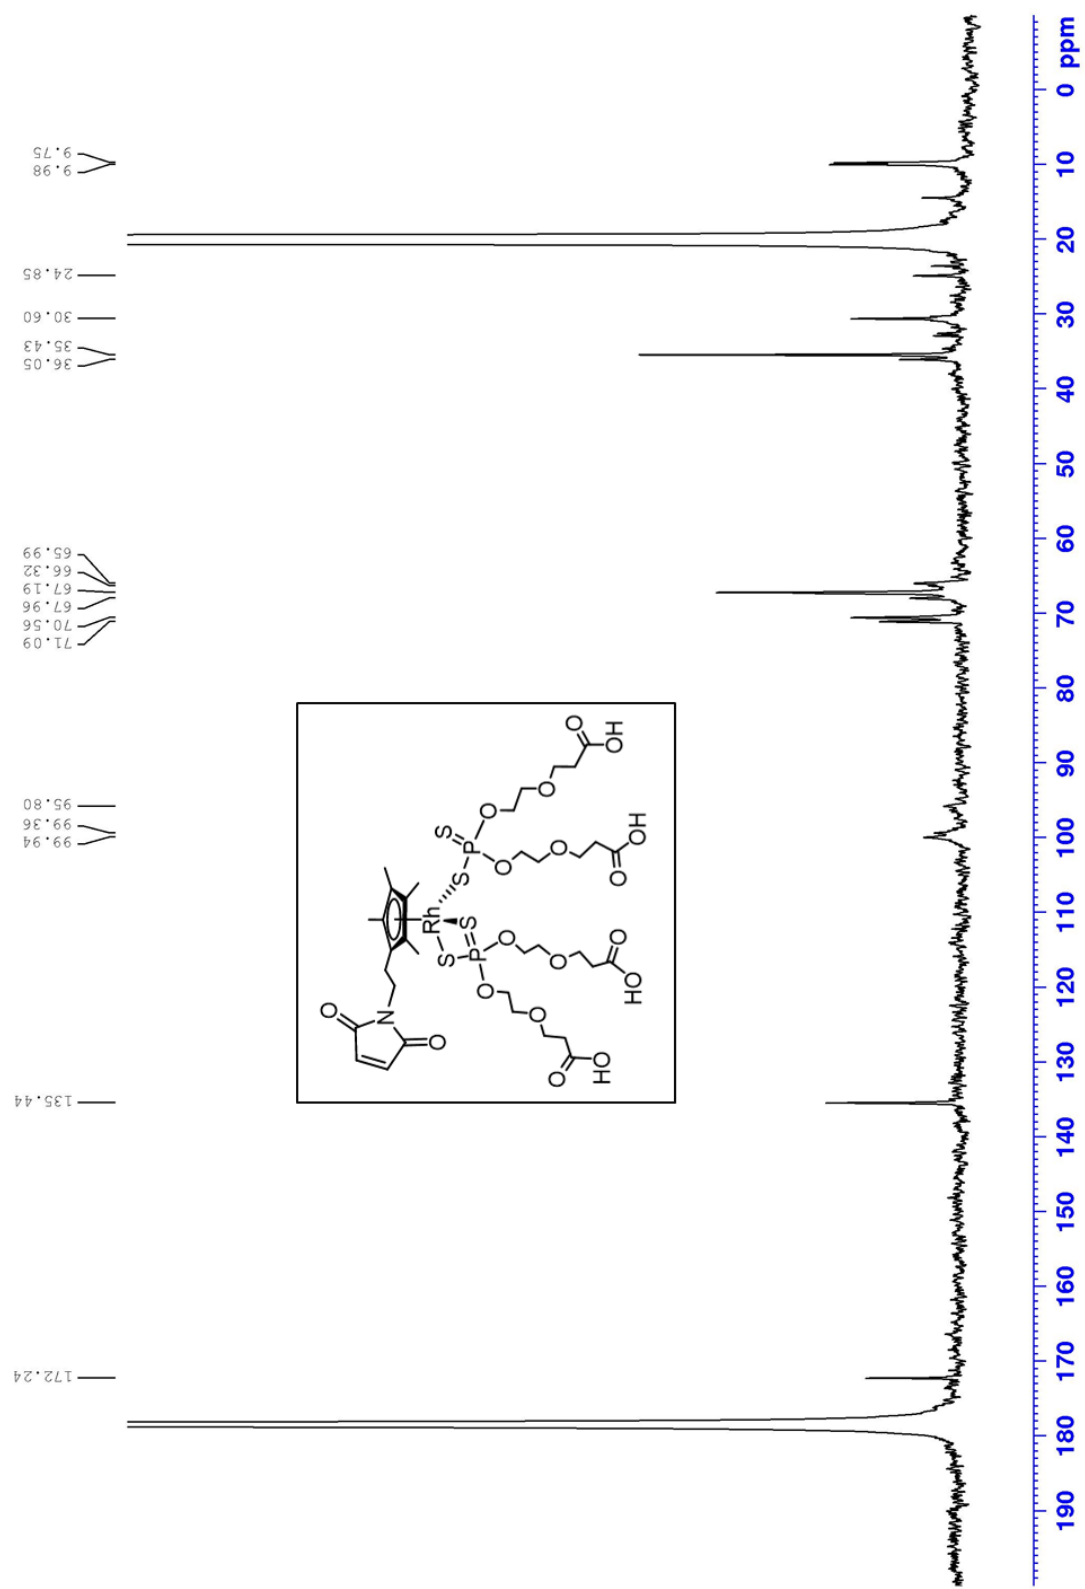

**Figure S21.**  $^{13}\text{C}$  NMR spectrum of **1'** in  $\text{acetic acid-}d_4$ .

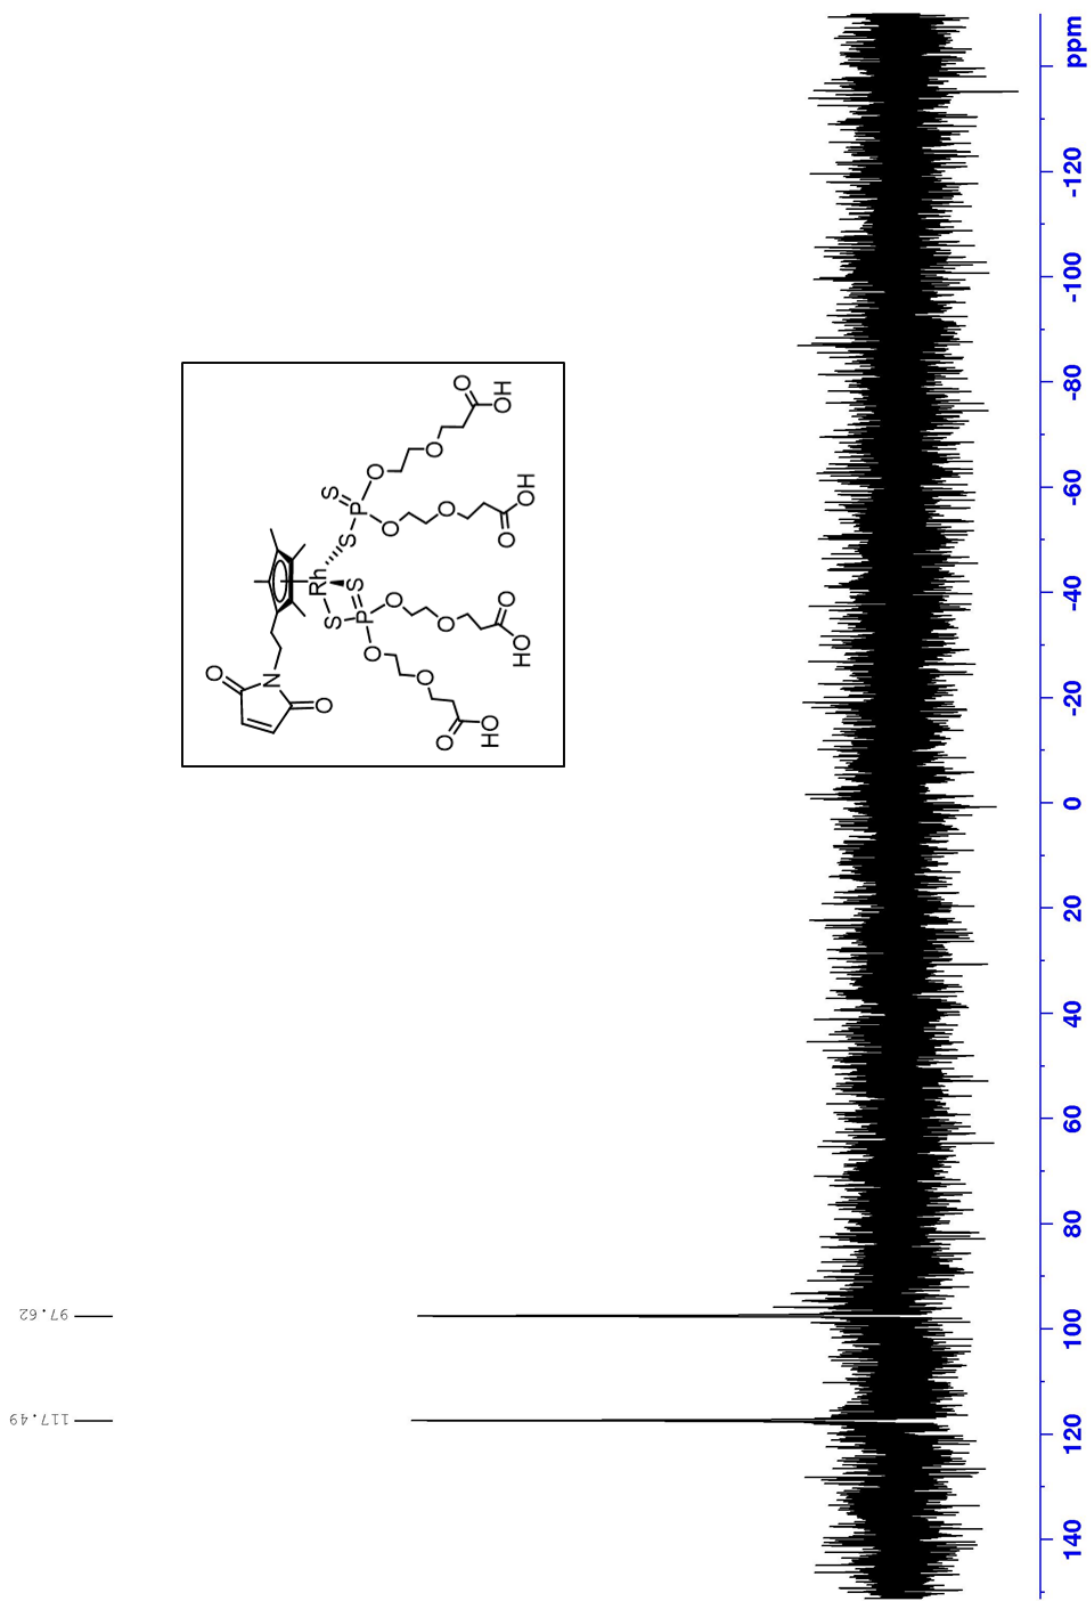

**Figure S22.**  $^{31}\text{P}$  NMR spectrum of **1'** in  $\text{acetic acid-}d_4$ .

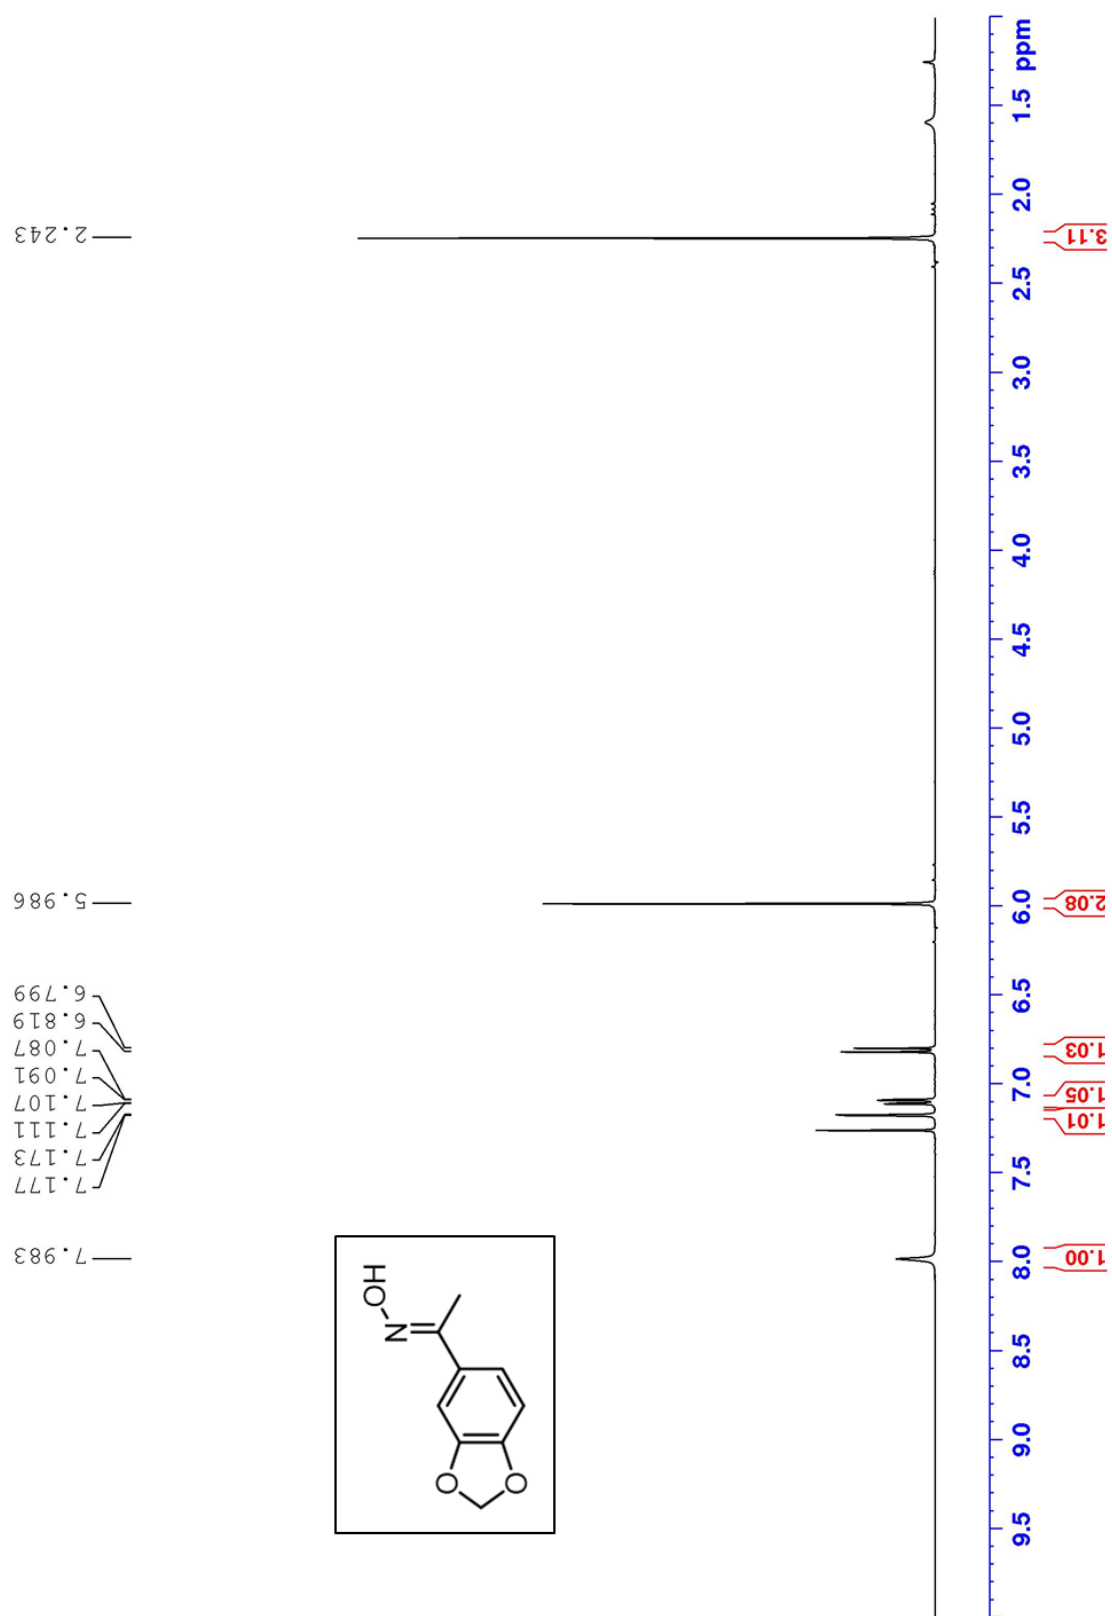

**Figure S23.** <sup>1</sup>H NMR spectrum of **2b** in CDCl<sub>3</sub>.

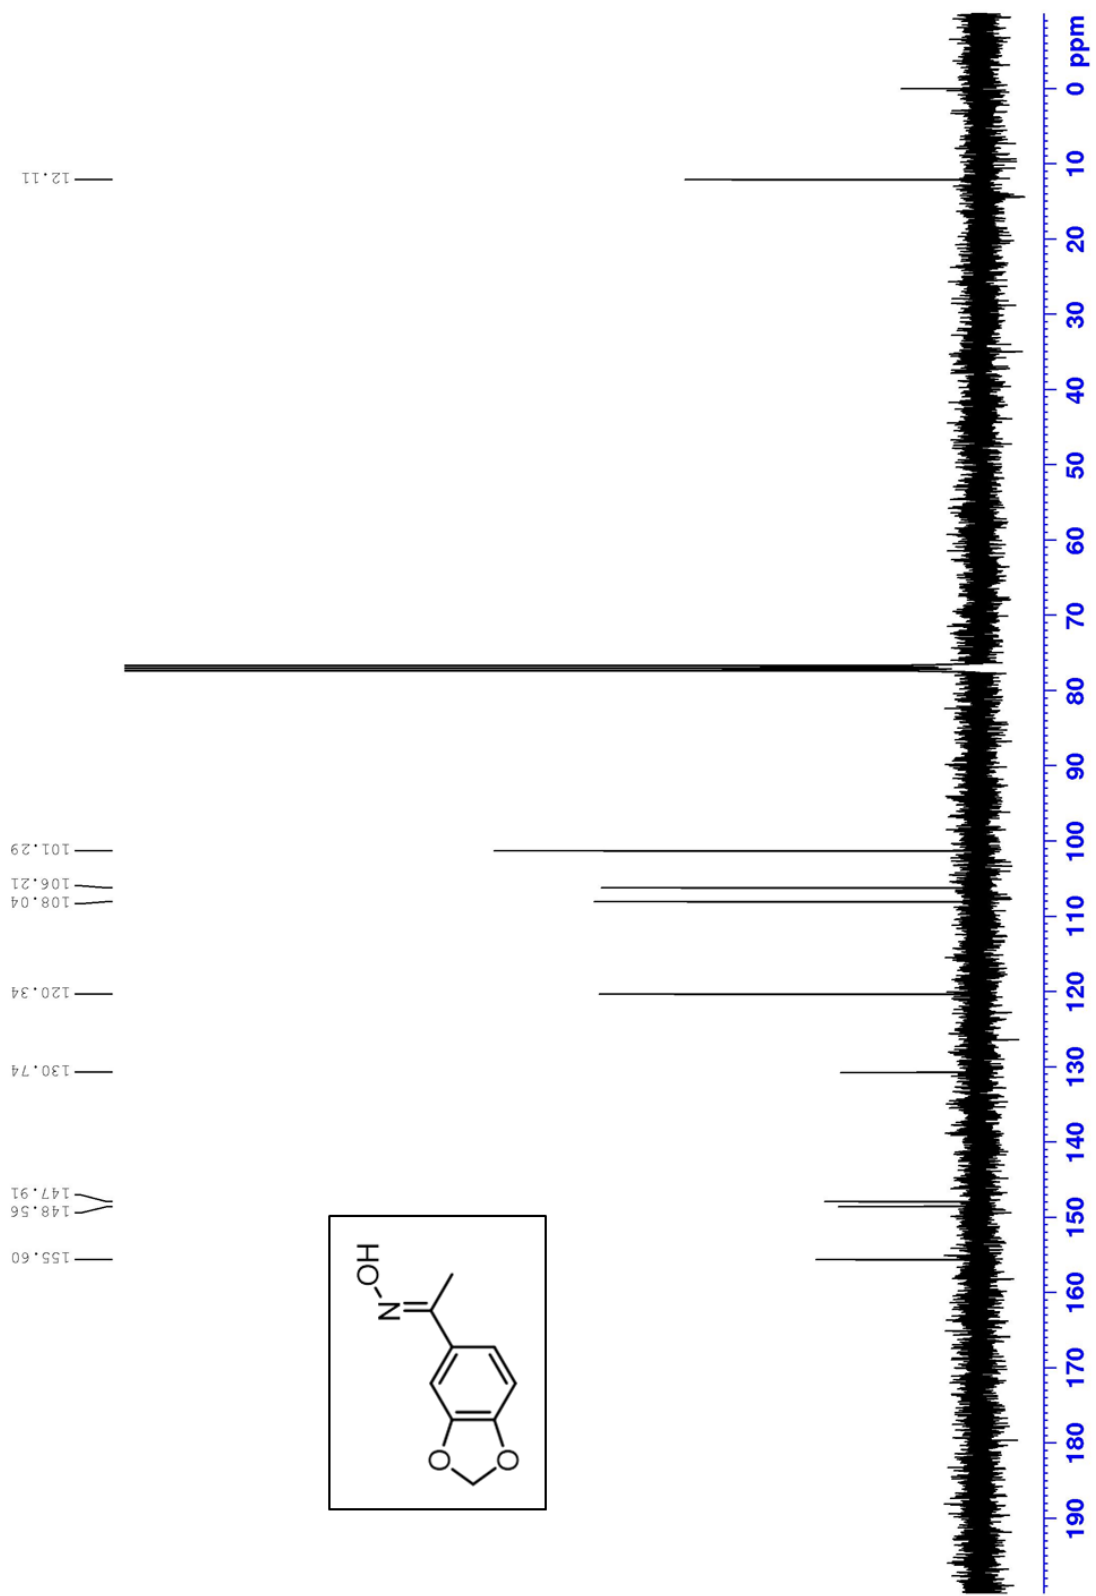

Figure S24. <sup>13</sup>C NMR spectrum of 2b in CDCl<sub>3</sub>.



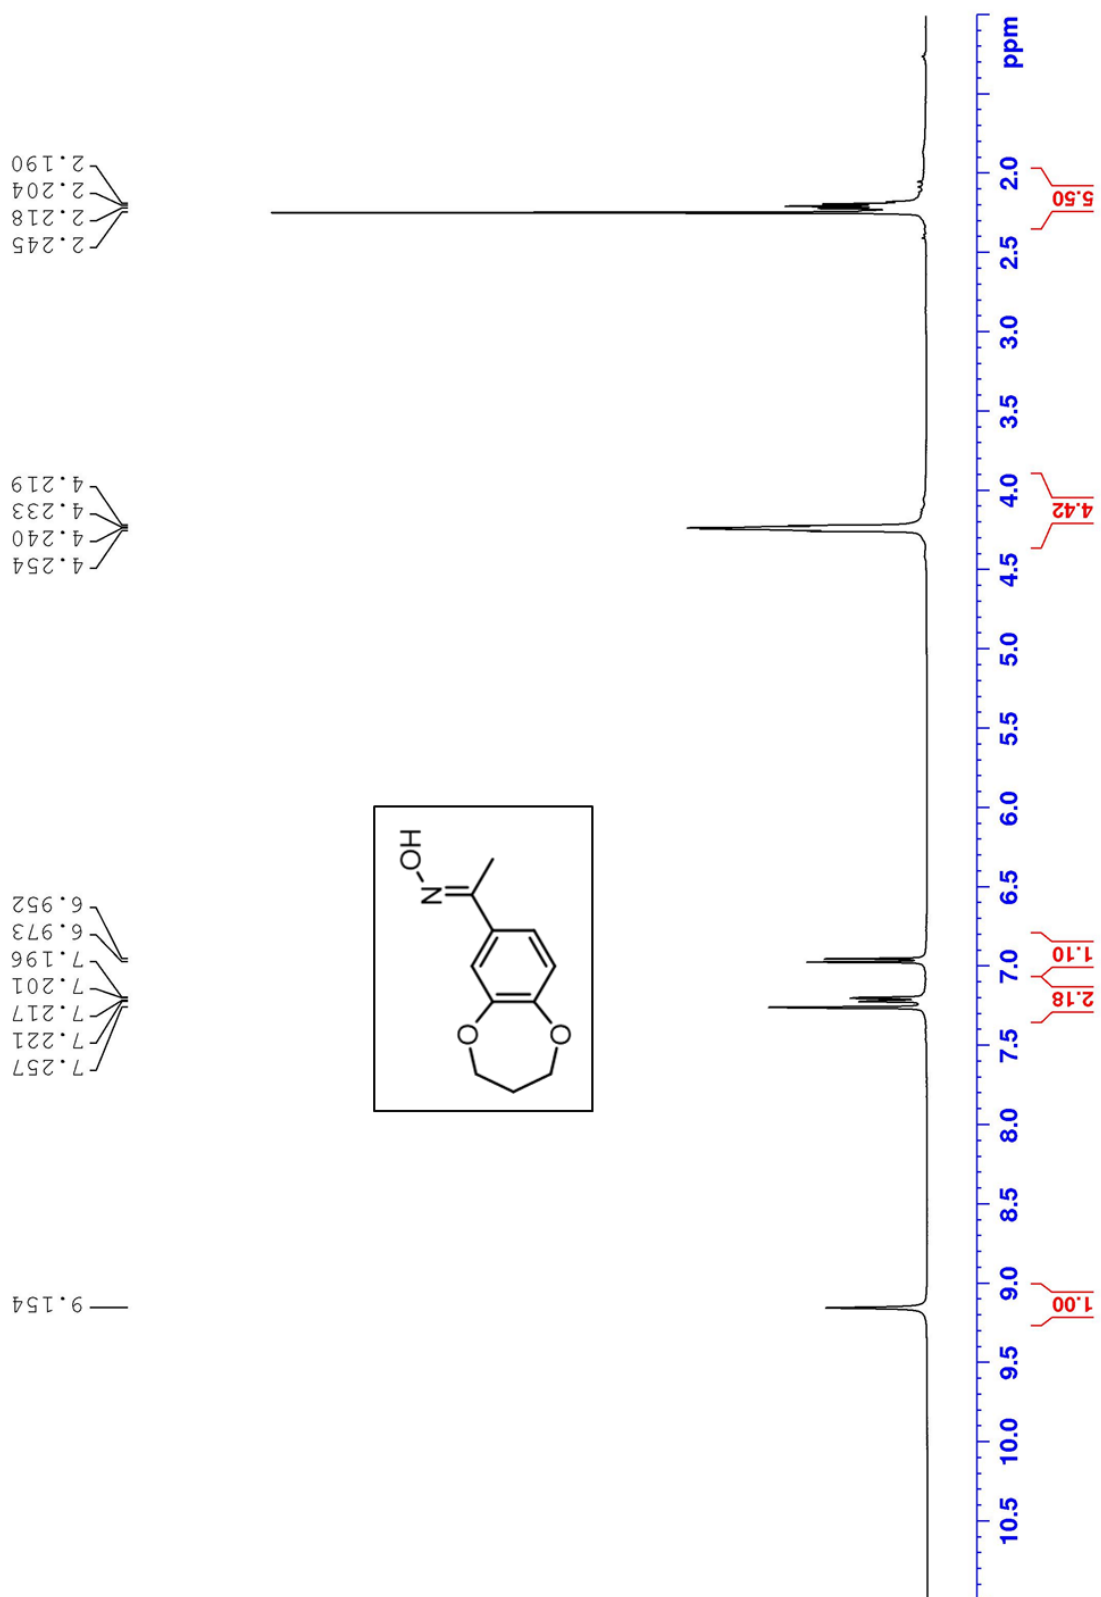

Figure S25. <sup>1</sup>H NMR spectrum of **2c** in CDCl<sub>3</sub>.

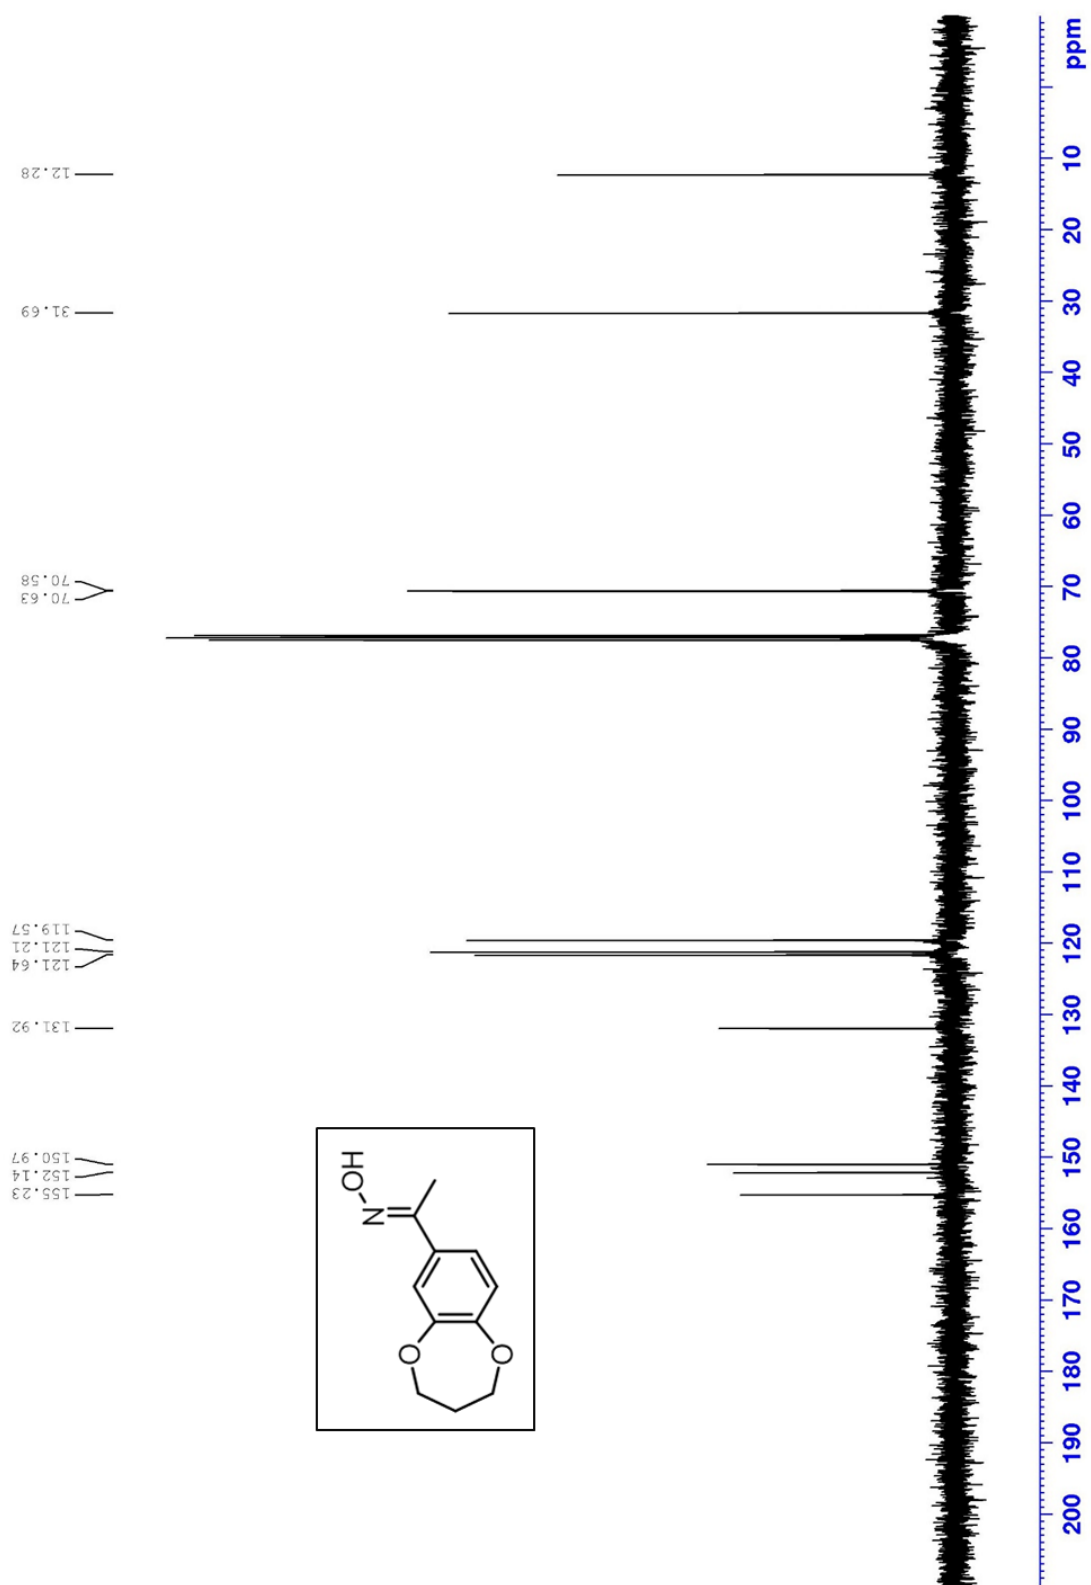

Figure S26.  $^{13}\text{C}$  NMR spectrum of **2c** in  $\text{CDCl}_3$ .

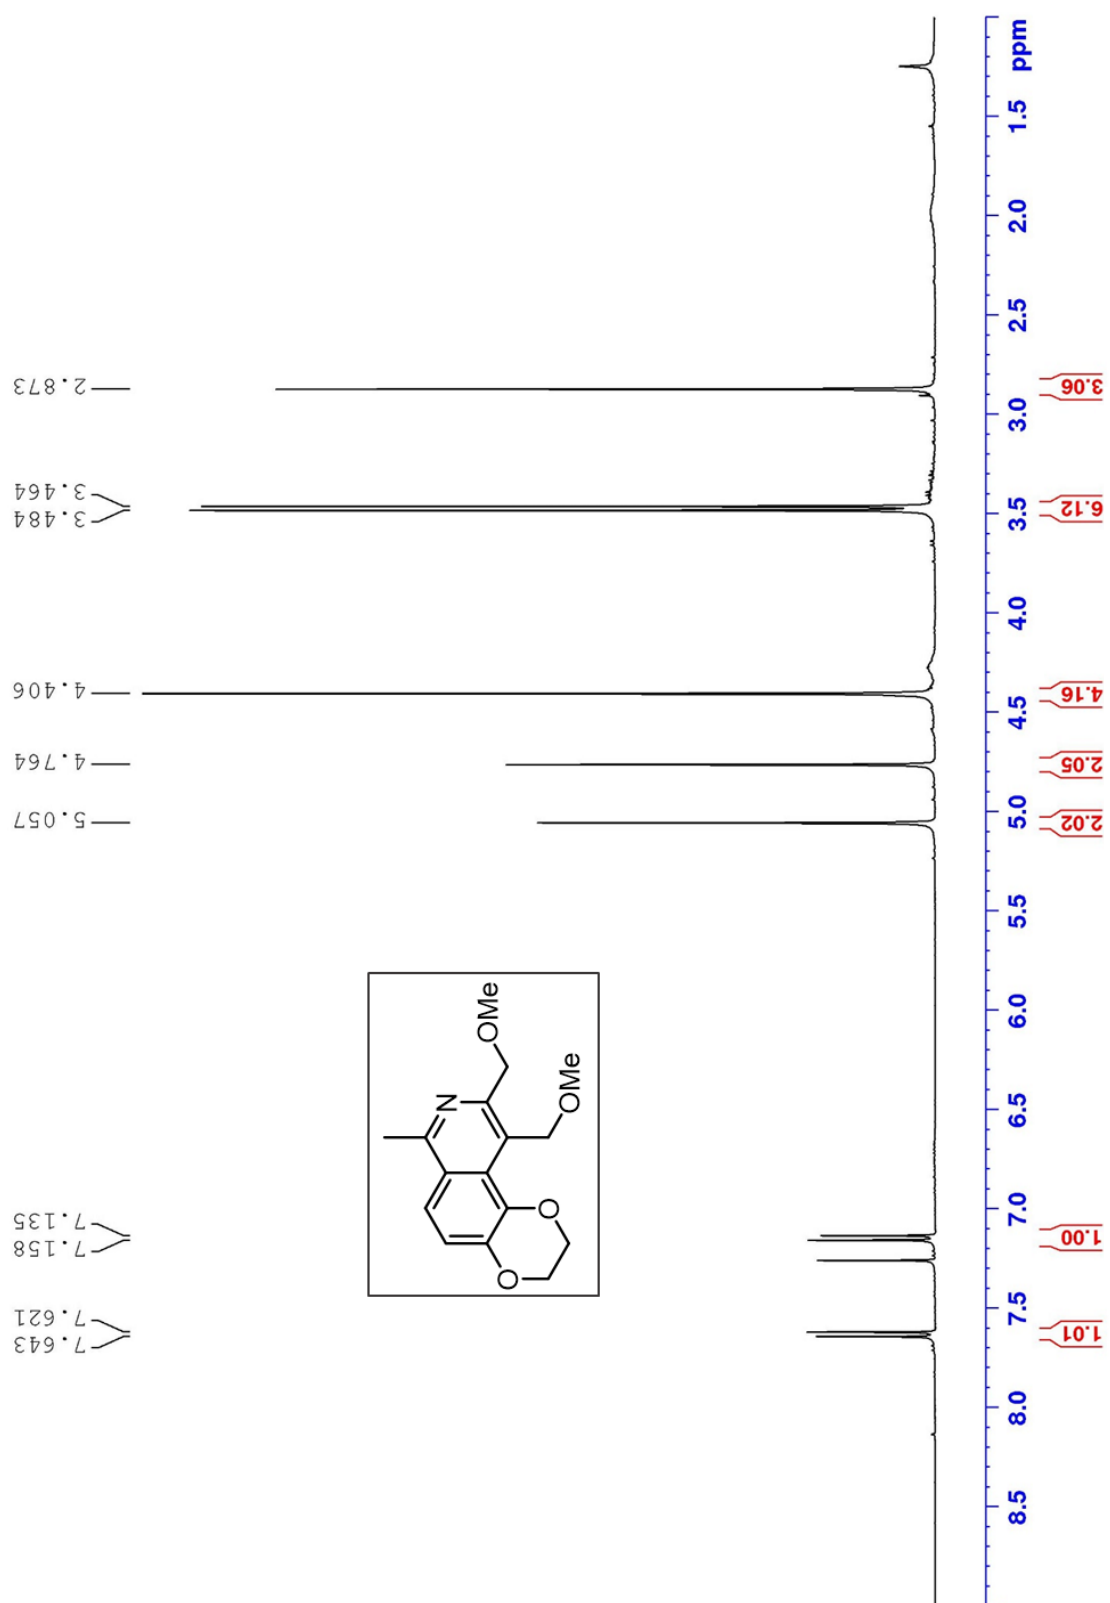

Figure S27. <sup>1</sup>H NMR spectrum of 4aa in CDCl<sub>3</sub>.

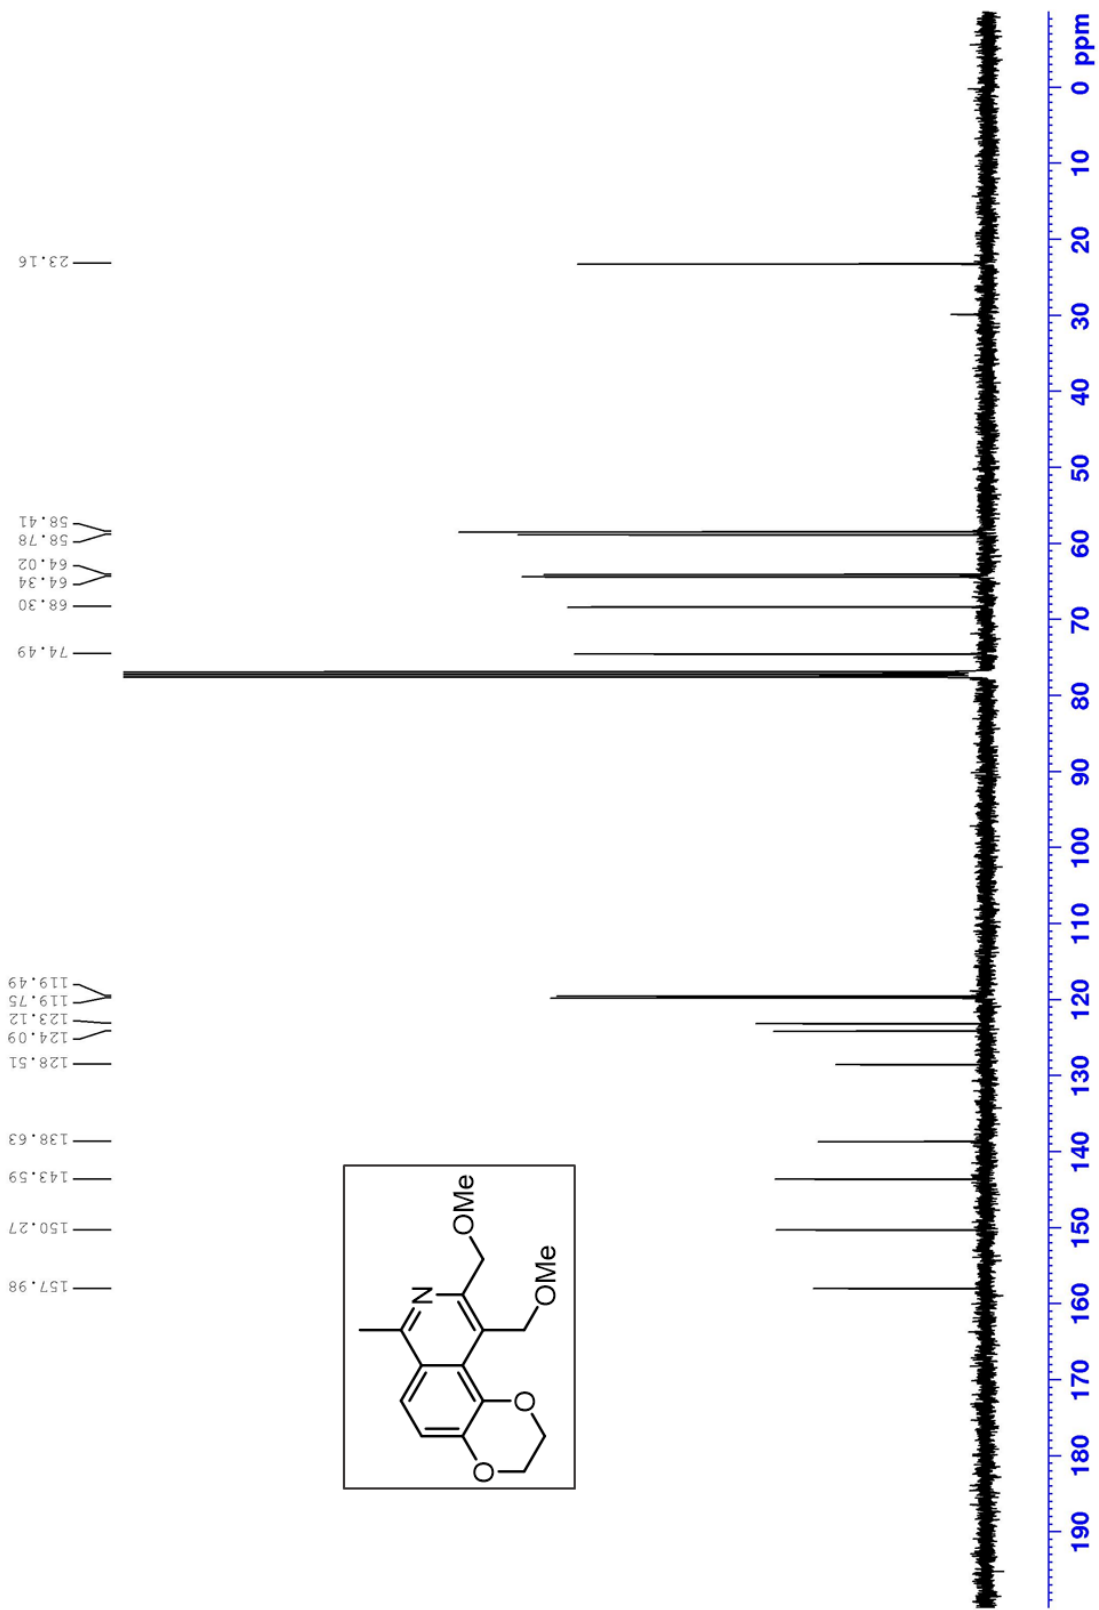

Figure S28. <sup>13</sup>C NMR spectrum of 4aa in CDCl<sub>3</sub>.

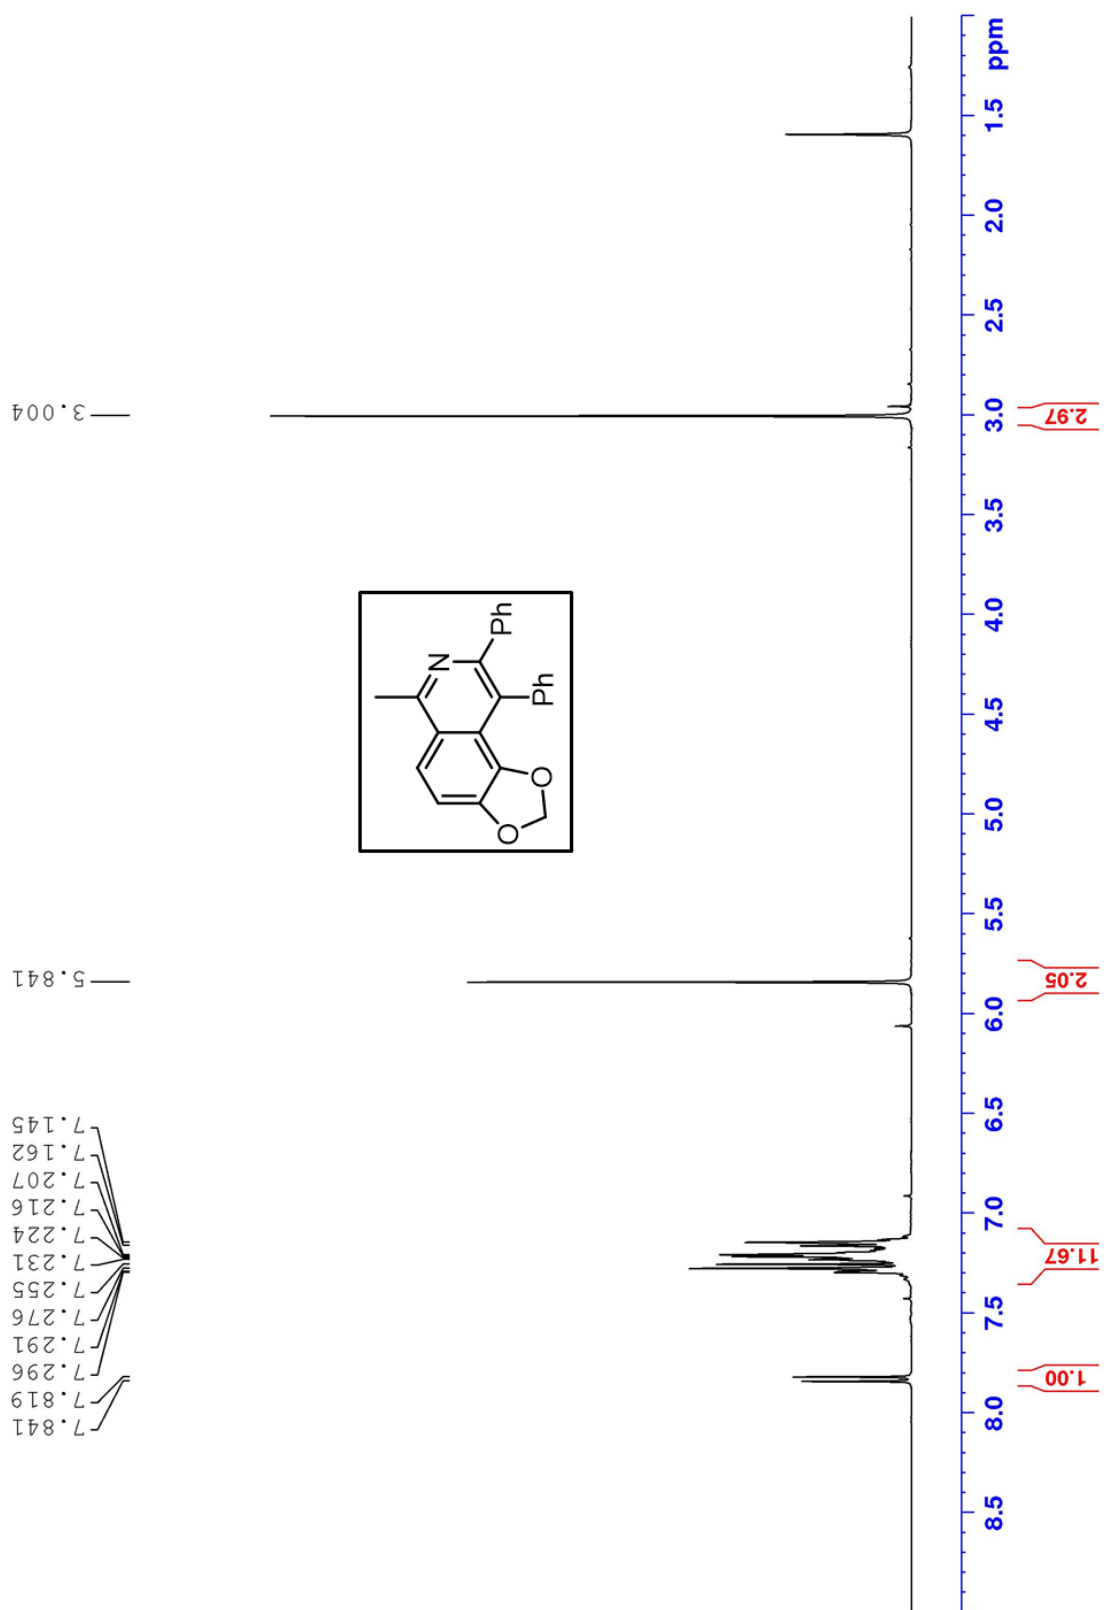

Figure S29. <sup>1</sup>H NMR spectrum of 4bb in CDCl<sub>3</sub>.

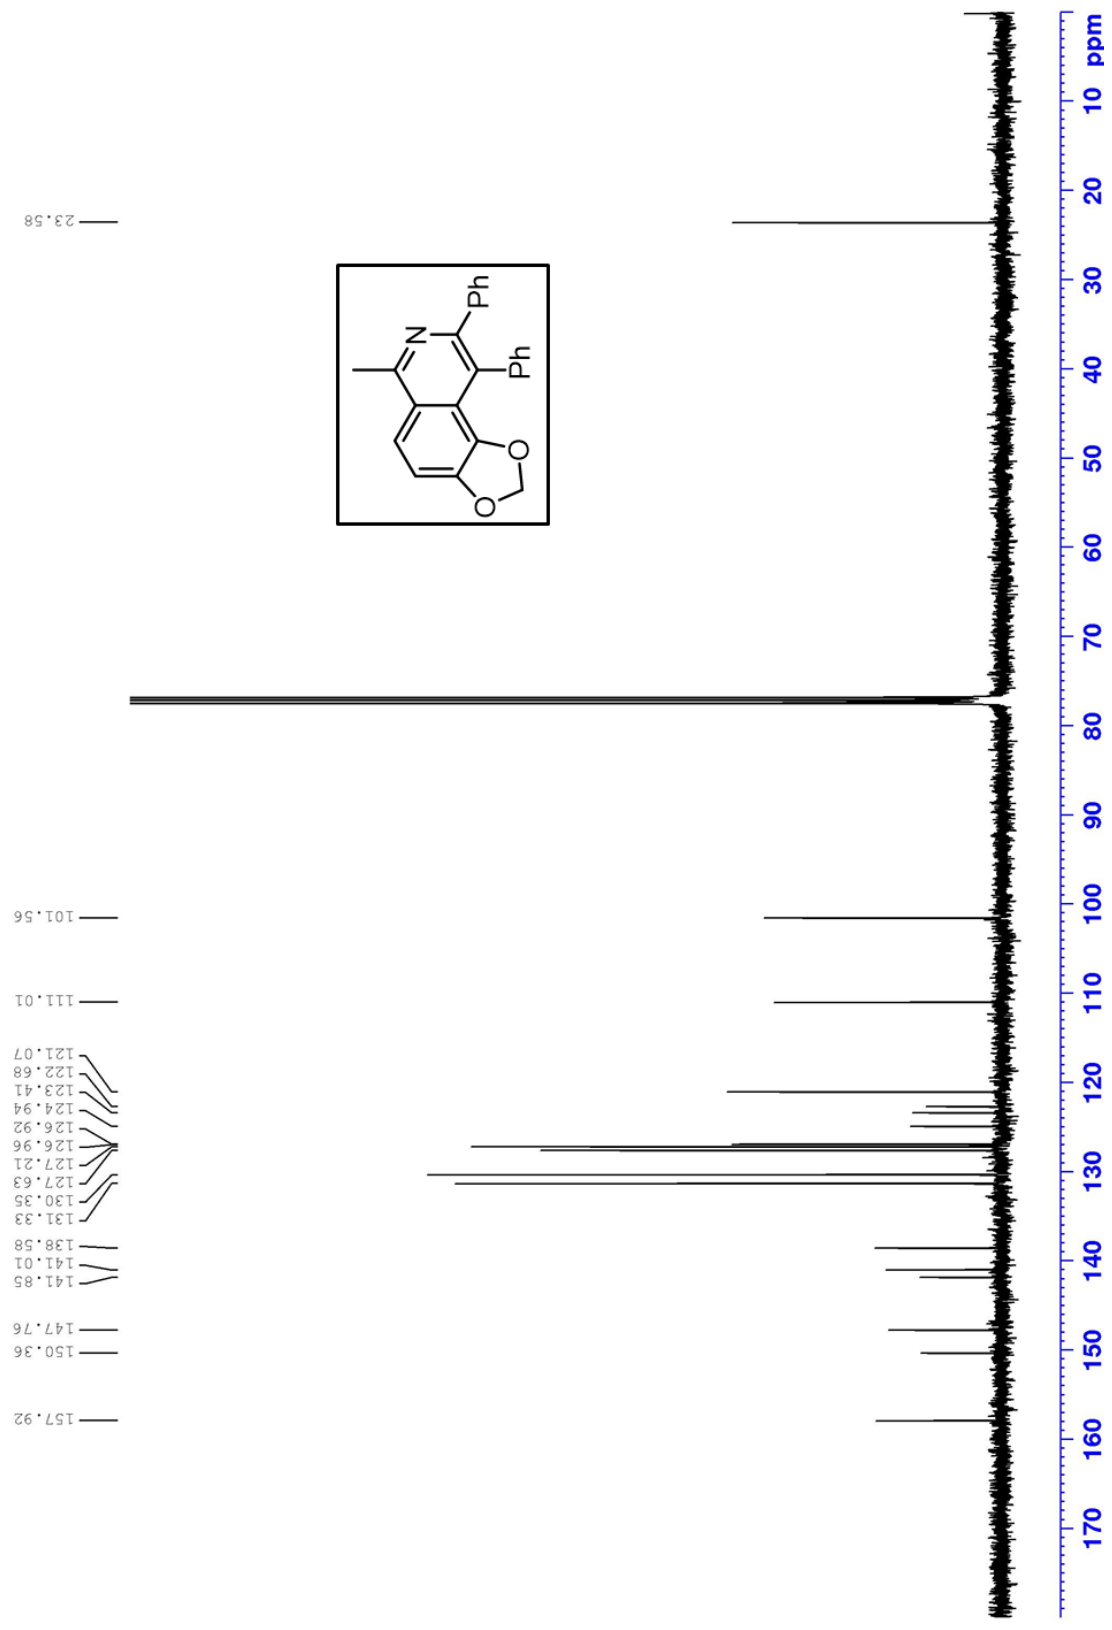

Figure S30. <sup>13</sup>C NMR spectrum of 4bb in CDCl<sub>3</sub>.

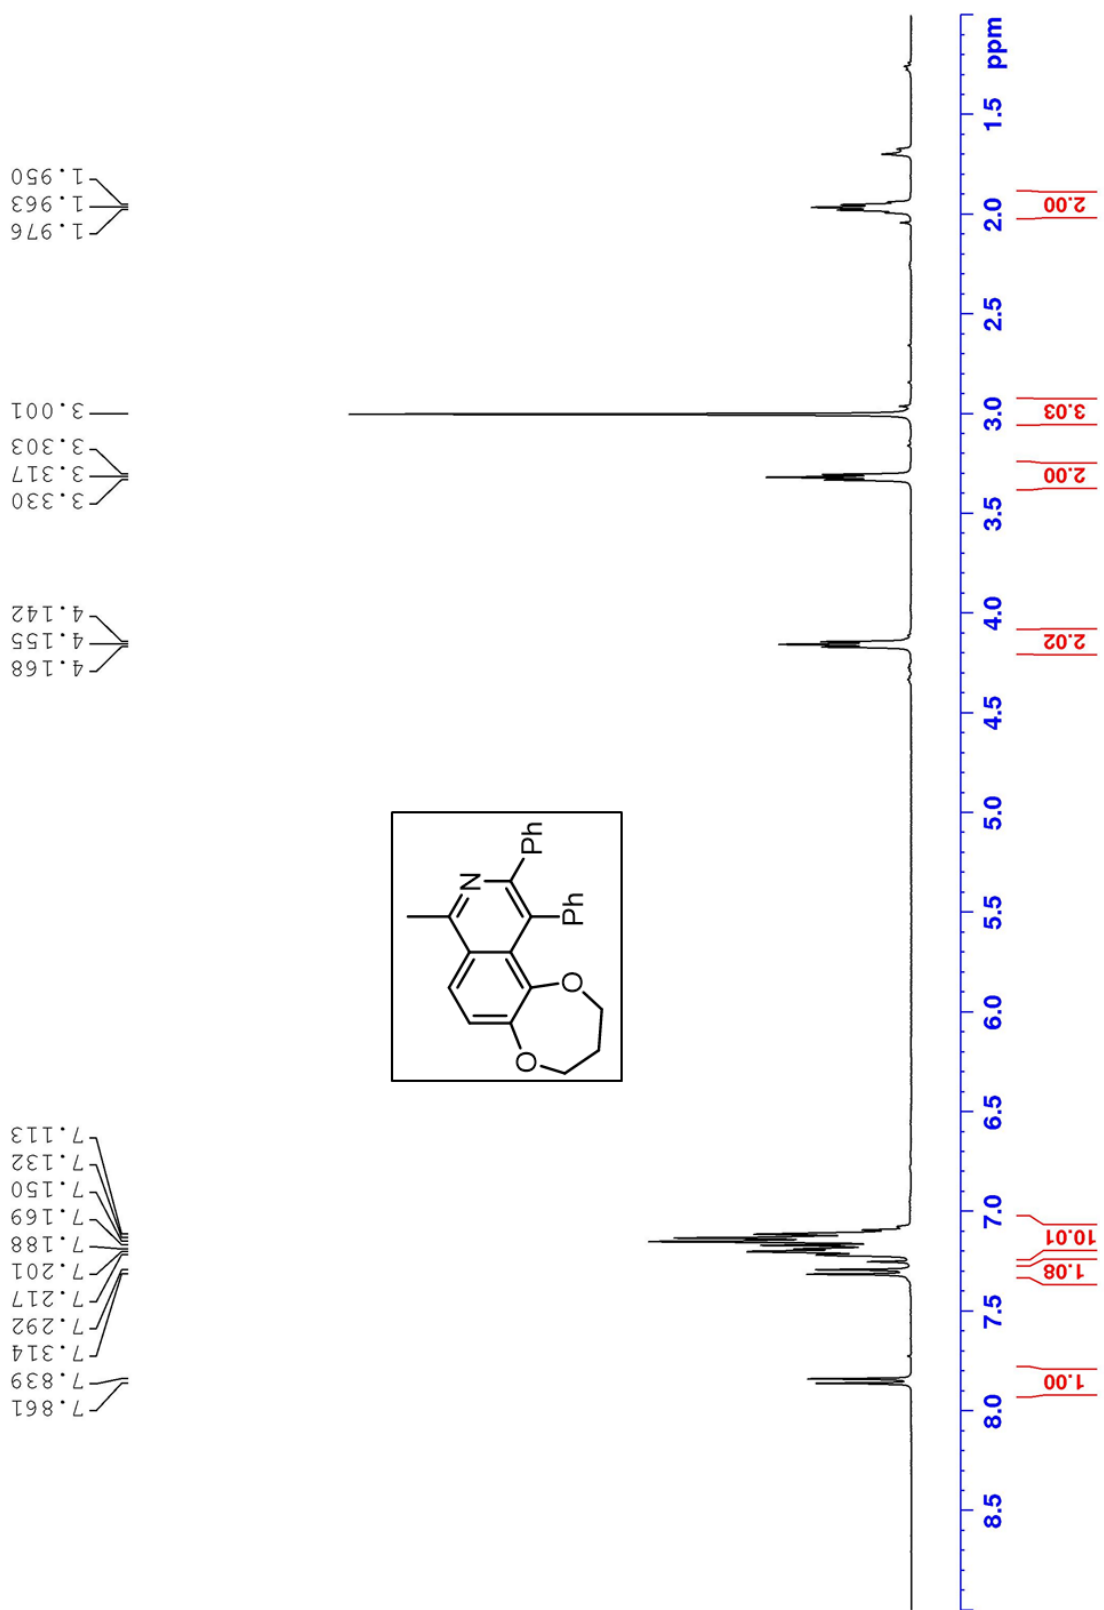

Figure S31. <sup>1</sup>H NMR spectrum of 4cb in CDCl<sub>3</sub>.

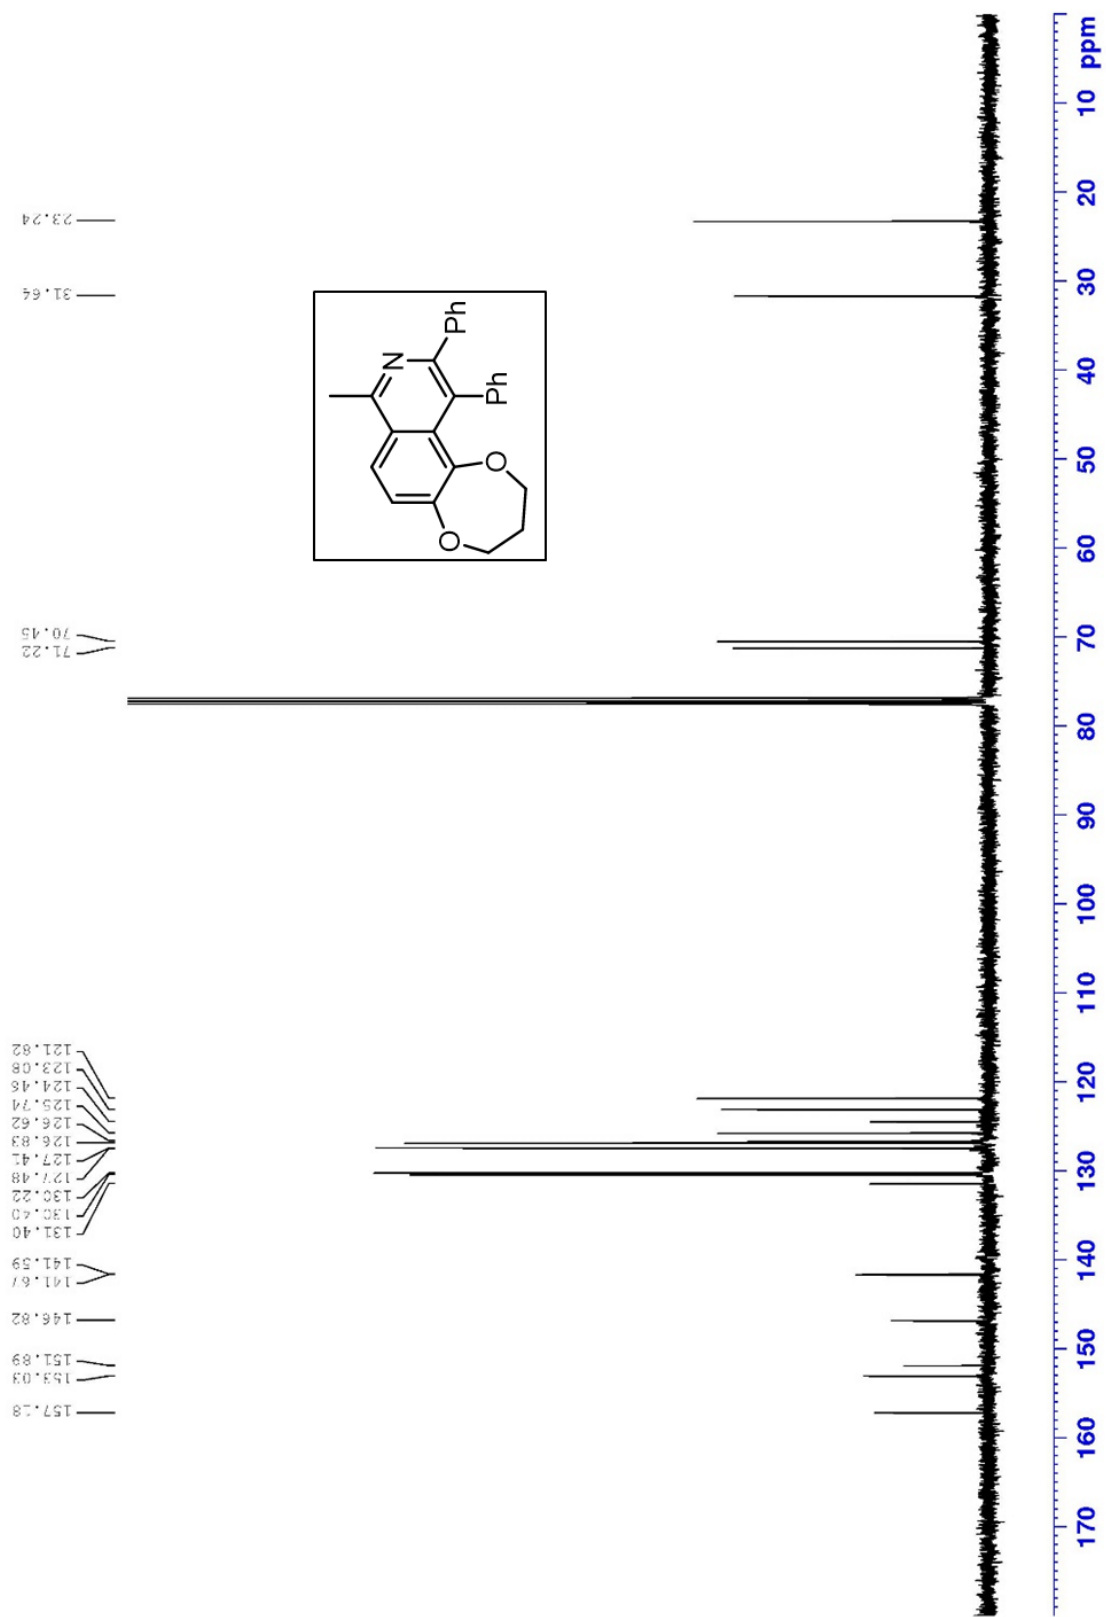

Figure S32. <sup>13</sup>C NMR spectrum of 4cb in CDCl<sub>3</sub>.



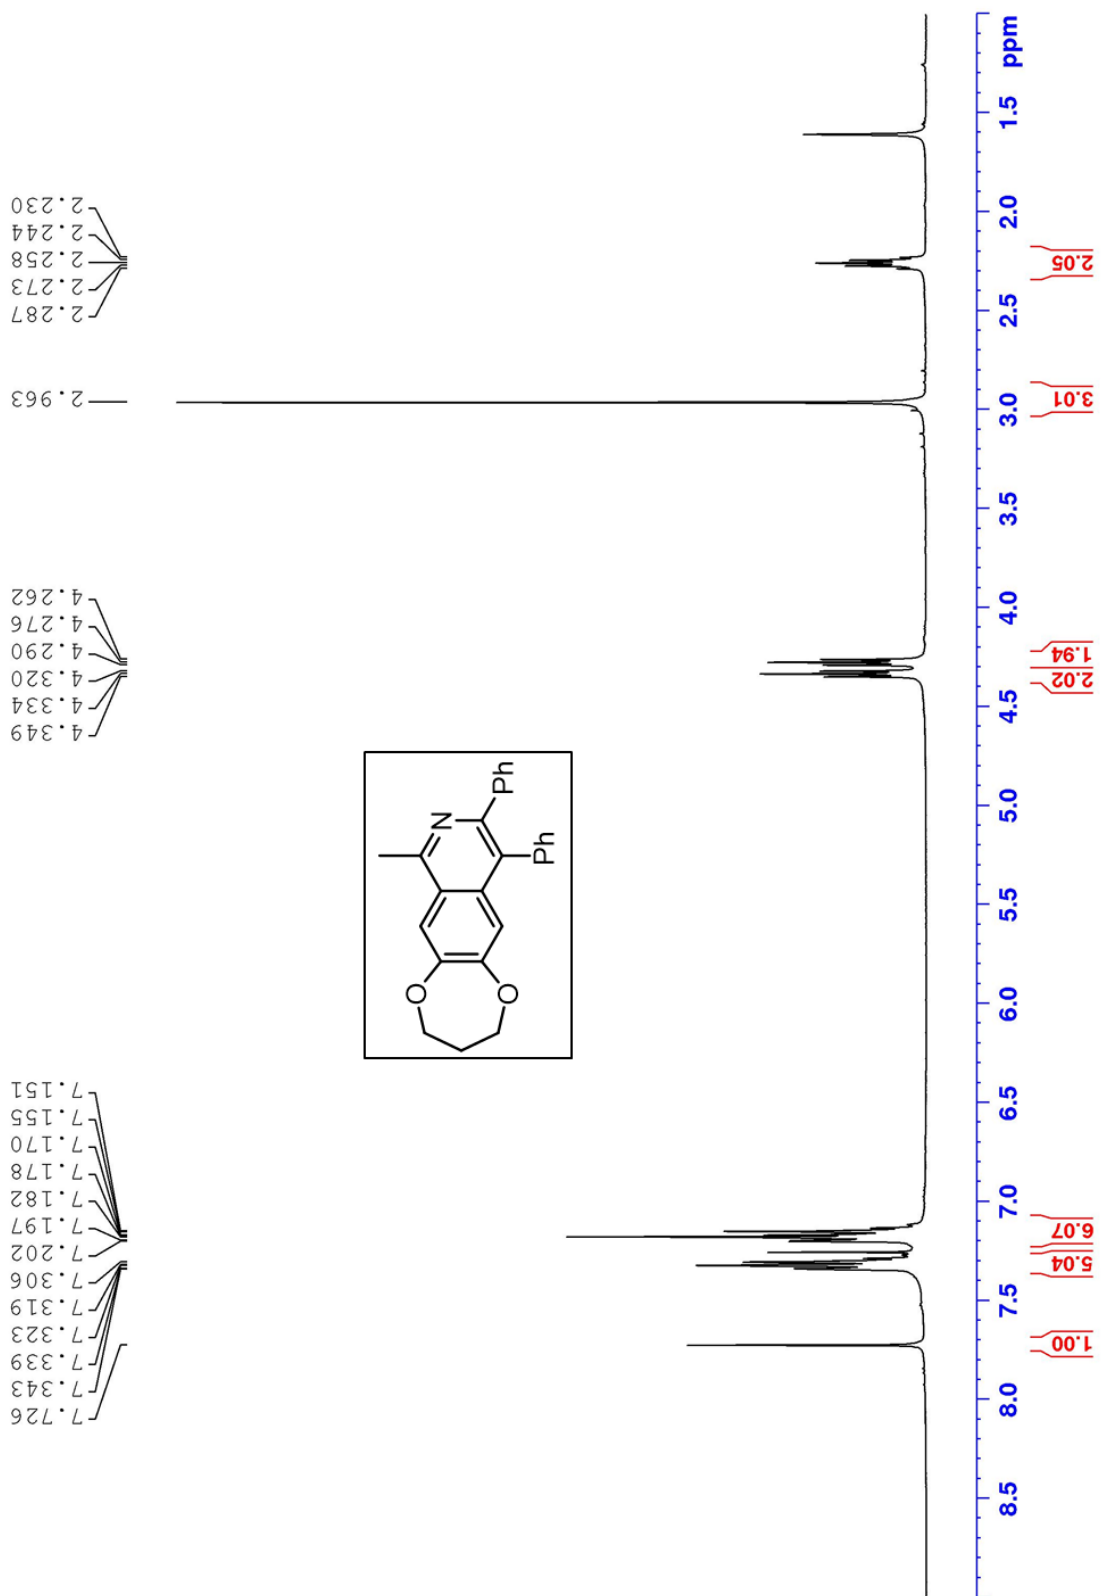

Figure S33. <sup>1</sup>H NMR spectrum of 5cb in CDCl<sub>3</sub>.

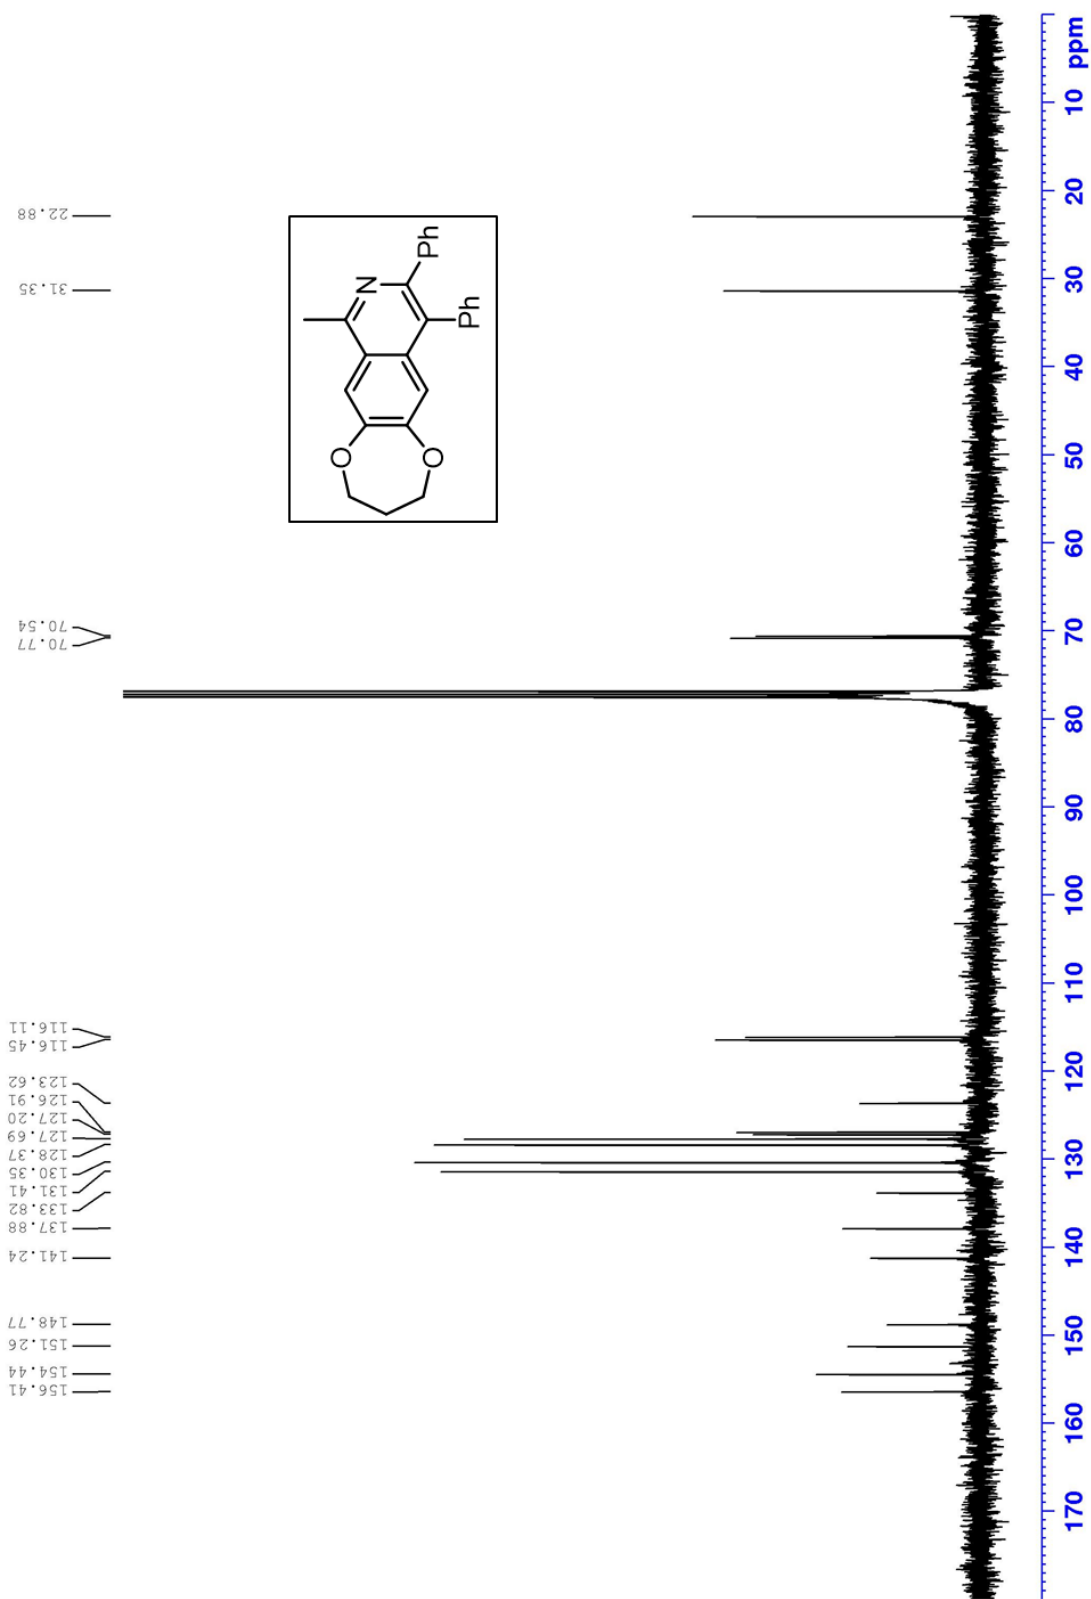

Figure S34. <sup>13</sup>C NMR spectrum of 5cb in CDCl<sub>3</sub>.

## **References**

- [1] S. Kato, A. Onoda, A. R. Grimm, K. Tachikawa, U. Schwaneberg, T. Hayashi, *Inorg. Chem.* **2020**, DOI 10.1021/acs.inorgchem.0c02245
- [2] L. Peng, Z. Zhang, C. Lei, S. Li, Z. Zhang, X. Ren, Y. Chang, Y. Zhang, Y. Xu, K. Ding, *ACS Med. Chem. Lett.* **2019**, *10*, 767–772.
- [3] T. Reiner, D. Jantke, A. Raba, A. N. Marziale, J. Eppinger, *J. Organomet. Chem.* **2009**, *694*, 1934–1937.
- [4] X. Zhang, D. Chen, M. Zhao, J. Zhao, A. Jia, X. Li, *Adv. Synth. Catal.* **2011**, *353*, 719–723.
